1 **Chaperoning of the histone octamer by the acidic domain of DNA repair factor APLF**

2

3 Ivan Corbeski<sup>1,7</sup>, Xiaohu Guo<sup>2</sup>, Bruna V. Eckhardt<sup>3</sup>, Domenico Fasci<sup>4</sup>, Wouter Wiegant<sup>6</sup>, Melissa A.  
4 Graewert<sup>5</sup>, Kees Vreeken<sup>6</sup>, Hans Wienk<sup>1,2</sup>, Dmitri I. Svergun<sup>5</sup>, Albert J.R. Heck<sup>4</sup>, Haico van Attikum<sup>6</sup>, Rolf  
5 Boelens<sup>1</sup>, Titia K. Sixma<sup>2\*</sup>, Francesca Mattioli<sup>3\*</sup>, Hugo van Ingen<sup>1\*</sup>

6 <sup>1</sup>NMR Spectroscopy, Bijvoet Centre for Biomolecular Research, Utrecht University, Padualaan 8, 3584 CH Utrecht, The  
7 Netherlands;

8 <sup>2</sup>Division of Biochemistry and Oncode Institute, The Netherlands Cancer Institute, Plesmanlaan 121, 1066 CX Amsterdam,  
9 The Netherlands;

10 <sup>3</sup>Hubrecht Institute, KNAW & University Medical Center Utrecht, Uppsalalaan 8, 3584 CT Utrecht, The Netherlands;

11 <sup>4</sup>Biomolecular Mass Spectrometry and Proteomics, Bijvoet Centre for Biomolecular Research and Utrecht Institute for  
12 Pharmaceutical Sciences, Utrecht University, Padualaan 8, 3584 CH, Utrecht, The Netherlands;

13 <sup>5</sup>European Molecular Biology Laboratory (EMBL), Hamburg Unit, DESY, Notkestrasse 85, D-22607 Hamburg, Germany;

14 <sup>6</sup>Department of Human Genetics, Leiden University Medical Center, Einthovenweg 20, 2333 ZC Leiden, The Netherlands;

15 <sup>7</sup>Present address: Department of Biochemistry, University of Zurich, Winterthurerstrasse 190, CH-8057 Zurich, Switzerland;

16

17 correspondence to: [h.vaningen@uu.nl](mailto:h.vaningen@uu.nl) correspondence may also be addressed to:  
18 [f.mattioli@hubrecht.eu](mailto:f.mattioli@hubrecht.eu), [t.sixma@nki.nl](mailto:t.sixma@nki.nl)

19

20 **one sentence summary**

21 Histone chaperone APLF assembles histones H2A-H2B/H3-H4 into histone octamers to deposit them  
22 onto DNA and form nucleosomes.

23

24

25 **Nucleosome assembly requires the coordinated deposition of histone complexes H3-H4 and**  
26 **H2A-H2B to form a histone octamer on DNA. In the current paradigm, specific histone**  
27 **chaperones guide the deposition of first H3-H4 and then H2A-H2B(1–5). Here, we show that**  
28 **the acidic domain of DNA repair factor APLF (APLF<sup>AD</sup>) can assemble the histone octamer in**  
29 **a single step, and deposit it on DNA to form nucleosomes. The crystal structure of the**  
30 **APLF<sup>AD</sup>–histone octamer complex shows that APLF<sup>AD</sup> tethers the histones in their**  
31 **nucleosomal conformation. Mutations of key aromatic anchor residues in APLF<sup>AD</sup> affect**  
32 **chaperone activity in vitro and in cells. Together, we propose that chaperoning of the**  
33 **histone octamer is a mechanism for histone chaperone function at sites where chromatin**  
34 **is temporarily disrupted.**

35

## 36 **Introduction**

37 APLF (Aprataxin and Polynucleotide kinase Like Factor) is a DNA repair factor in non-homologous end  
38 joining (NHEJ) repair of DNA double-strand breaks(6–8), a critical pathway involved in immune  
39 responses and cancer biology(9, 10). APLF is recruited to DNA break sites through interactions with  
40 DNA-end binding protein Ku and the XRCC4-DNA Ligase IV complex to form a scaffold for the NHEJ  
41 machinery(8, 11, 12). In addition to its role as a scaffold, APLF has been shown to also have histone  
42 chaperone activity via its conserved C-terminal acidic domain (APLF<sup>AD</sup>) (13) (Fig. 1A and Fig. S1). The  
43 precise role of APLF as a histone chaperone during DNA damage repair is not fully understood. It has  
44 been suggested to play a role in recruitment and exchange of histone H2A variant macroH2A, but also  
45 to regulate the deposition of H3-H4 on DNA through specific binding of H3-H4 (13). We recently found  
46 that APLF<sup>AD</sup> is intrinsically disordered and can bind H2A-H2B as well as H3-H4 with high affinity(14).  
47 Such promiscuous histone binding has been observed before for other histone chaperones(15–19)  
48 and argued to play a role in nucleosome assembly(20–22), but its structural basis and implications are  
49 not fully understood. In particular, these histone chaperones could challenge the notion that  
50 nucleosome assembly is a step-wise process in which first H3-H4 is deposited on the DNA and  
51 then H2A-H2B, with each step guided by specific histone chaperones (1-5). We therefore  
52 wanted to understand how APLF interacts with H2A-H2B and H3-H4 and determine its functional  
53 consequences.

54

55

## 56 Results and discussion

### 57 *APLF<sup>AD</sup> has distinct binding sites for H2A-H2B and H3-H4*

58 We first wondered if H2A-H2B and H3-H4 bind to the same or to different sites in APLF<sup>AD</sup>. Using nuclear  
59 magnetic resonance (NMR) spectroscopy, we found that addition of either H2A-H2B or H3-H4 to  
60 APLF<sup>AD</sup> resulted in severe peak intensity losses for distinct groups of residues, showing that APLF<sup>AD</sup>  
61 contains two non-overlapping, adjacent binding regions for H3-H4 (residues N460-E474) and H2A-H2B  
62 (residues Y476-E486) (Fig. 1B,C). Both regions contain two aromatic residues. Previously we showed  
63 that Y476 and W485 are required for H2A-H2B binding(14), suggesting that Y462 and/or F468 could  
64 be crucial for H3-H4 binding. Other studies had however indicated W485 to be crucial for interaction  
65 with H3-H4 rather than H2A-H2B based on pull-down experiments at high salt(13). To resolve this, we  
66 performed isothermal titration calorimetry (ITC) experiments and found that Y462 is important for  
67 H3-H4 binding, while Y476A/W485A (named double anchor mutant DA-AB) had negligible influence  
68 on binding H3-H4 (Fig. S2). Further NMR experiments showed that H3-H4 binding involves the  $\alpha$ 1- $\alpha$ 2  
69 region of H3 (Fig. S2), analogous to our earlier results on H2A-H2B binding where binding entailed the  
70  $\alpha$ 1- $\alpha$ 2 region of H2A and H2B(14). These data indicate that APLF<sup>AD</sup> has a distinct set of aromatic anchor  
71 residues to bind either H2A-H2B or H3-H4 in a specific manner.

### 72 *APLF<sup>AD</sup> binds H2A-H2B and H3-H4 as a histone octamer complex*

73 To test whether APLF<sup>AD</sup> could bind to both H2A-H2B and H3-H4 simultaneously, we added APLF<sup>AD</sup> to a  
74 stoichiometric mixture of H2A-H2B and H3-H4 (referred to as octamer-mix) and analyzed complex  
75 formation using size-exclusion chromatography (SEC) (Fig. 1D and Fig. S3). As expected, in the absence  
76 of other factors the mixture eluted as separate histone dimer and histone tetramer complexes.  
77 Strikingly, upon addition of APLF<sup>AD</sup> a single high-molecular weight complex was obtained that  
78 contained all three components: APLF<sup>AD</sup>, H2A-H2B, and H3-H4 (Fig. S3). This indicated that two APLF<sup>AD</sup>  
79 may be able to chaperone (i.e., bind) all histone components of the nucleosome at once. To further  
80 confirm this, we used native mass spectrometry (MS) and observed formation of a complex of 123  
81 kDa, corresponding to two APLF<sup>AD</sup> bound to two copies of H2A-H2B and H3-H4 each, (APLF<sup>AD</sup>-H2A-  
82 H2B-H3-H4)<sub>2</sub> (Fig. 1E and Fig. S4). This complex has overall globular shape as shown from small-angle  
83 X-ray scattering experiments (Fig. S5) and is formed with sub-micromolar affinity ( $K_D \sim 150$  nM) as  
84 measured from ITC experiments (Fig. S6). Overall, these data demonstrate that APLF<sup>AD</sup> can bind H2A-  
85 H2B and H3-H4 simultaneously to form a stable and high-affinity complex that contains the core  
86 histones at the same stoichiometry as found in the nucleosome.

87

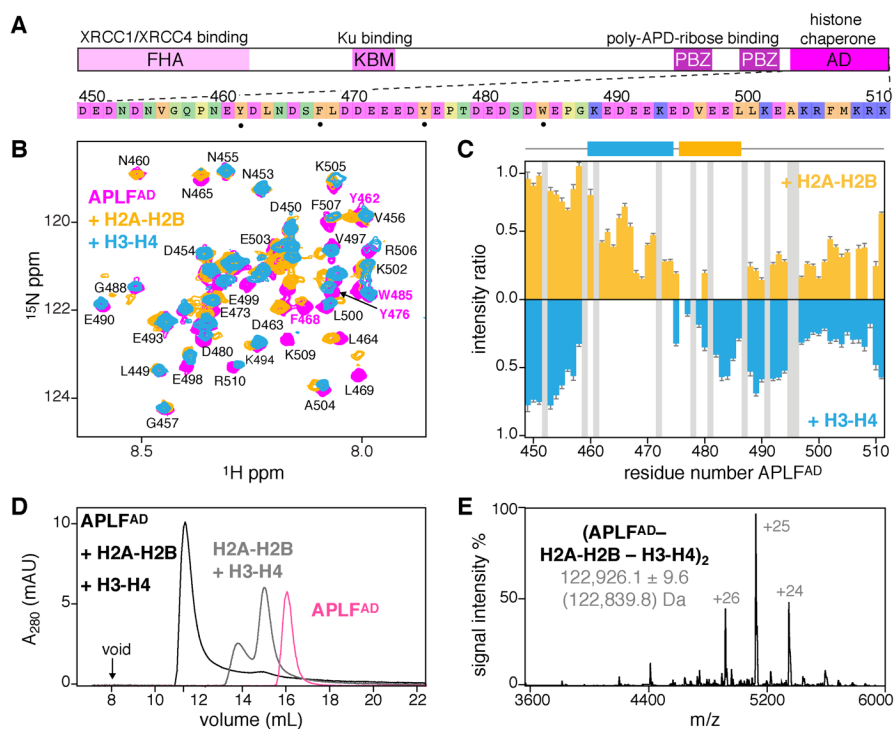

88

89 **Fig. 1 | APLF<sup>AD</sup> binds H2A-H2B and H3-H4 to form a (APLF<sup>AD</sup>-H2A-H2B-H3-H4)<sub>2</sub> complex.** A, APLF domain  
 90 organization and domain function together with APLF<sup>AD</sup> sequence, color coded according to amino acid  
 91 properties. Key residues for histone interactions (•) indicated. B, Overlaid NMR spectra of APLF<sup>AD</sup>, free and  
 92 bound to H2A-H2B or H3-H4. Aromatic residues labeled in magenta. Assignments from ref. (14). C, Relative  
 93 APLF<sup>AD</sup> NMR peak intensities upon binding H2A-H2B or H3-H4. Residues without data (prolines/overlapped  
 94 peaks) in gray. The H2A-H2B (orange) and H3-H4 (blue) binding regions are indicated. D, SEC analysis of APLF<sup>AD</sup>  
 95 and octamer-mix (H2A-H2B + H3-H4) in absence and presence of saturating amounts of APLF<sup>AD</sup>. E, Native-MS  
 96 spectrum of the APLF<sup>AD</sup>-histone complex with experimental (theoretical in brackets) molecular weights of the  
 97 identified species.

98

99 *APLF<sup>AD</sup> assembles H2A-H2B and H3-H4 as a native histone octamer*

100 To understand how APLF chaperones core histones in the (APLF<sup>AD</sup>-H2A-H2B-H3-H4)<sub>2</sub> complex, we set  
 101 out to solve its structure. We obtained crystals of the complex reconstituted from tailless histones and  
 102 a truncated APLF<sup>AD</sup> construct corresponding to residues 449-490 (APLF<sup>AD-Δ</sup>). This truncation does not  
 103 affect the binding affinity of APLF<sup>AD</sup> for histones (see Fig. 4A below). We resolved the crystal structure  
 104 of this complex at 2.35 Å resolution (Fig. 2, Fig. S7 and Table S1). The histones H2A-H2B and H3-H4 in  
 105 the APLF<sup>AD-Δ</sup>-complex are arranged as in the nucleosome(23, 24) (0.56 Å backbone RMSD), involving  
 106 histone-histone contacts across the H3-H3' tetramerization interface, the H2B-H4 helical bundle, the  
 107 H2A-H2A' interface and the H2A docking domain to H3-H4 (Fig. S8). The structure has overall pseudo  
 108 two-fold symmetry, where two APLF<sup>AD</sup> flank the octamer, tethering H2A-H2B to H3-H4 within a

109 histone half-octamer (Fig. 2A). APLF<sup>AD</sup> imposes both a steric and electrostatic block at the binding sites  
110 of both nucleosomal DNA gyres (Fig. 2B,C).

111 APLF<sup>AD</sup> makes substantial interactions with both H2A-H2B and H3-H4, covering  $\sim 800 \text{ \AA}^2$  of histone  
112 surface on H3-H4 and  $\sim 400 \text{ \AA}^2$  on H2A-H2B (Fig. 2D). The regions involved in H3-H4 binding (residues  
113 P459-D471) and H2A-H2B binding (residues D482-P487) match well to the NMR results (Fig. 1C). The  
114 interaction is partially electrostatic, with an extensive network of intermolecular hydrogen bonds (Fig.  
115 2D). Many of these interactions involve histone residues that otherwise bind the DNA phosphate  
116 backbone in the nucleosome, thus mimicking histone-DNA interactions (Fig. S8). In addition, aromatic  
117 residues of APLF<sup>AD</sup> provide anchors that make extensive van der Waals interactions with the histones.  
118 APLF residues Y462 and F468 protrude deeply into hydrophobic pockets on the H3  $\alpha 1$ - $\alpha 2$ -patch (Fig.  
119 2D,E), consistent with their role in H3-H4 binding (Fig. S2). Similarly, APLF W485 anchors to a shallow  
120 hydrophobic pocket on the H2B  $\alpha 1$ - $\alpha 2$ -patch (Fig. 2D,F), in line with its role in H2A-H2B binding(14).  
121 Electron density for residues (E472-E481) that connect the H2A-H2B and H3-H4 binding regions is  
122 incomplete or missing in all but one of the APLF<sup>AD-Δ</sup> chains (Fig. S7), suggesting that this segment forms  
123 a flexible linker. Overall, APLF<sup>AD</sup> makes use of multiple known histone dimer binding modes: the cap-  
124 anchor(25) and the R-finger interaction(26) for H2A-H2B, and the aromatic-key motif(27) for H3-H4  
125 binding (Fig. 2E,F). Structural comparison to other histone chaperones (Fig. S9 and S10) shows that  
126 APLF<sup>AD</sup> uniquely combines these binding modes to bind H2A-H2B and H3-H4 simultaneously in their  
127 native histone octamer configuration.

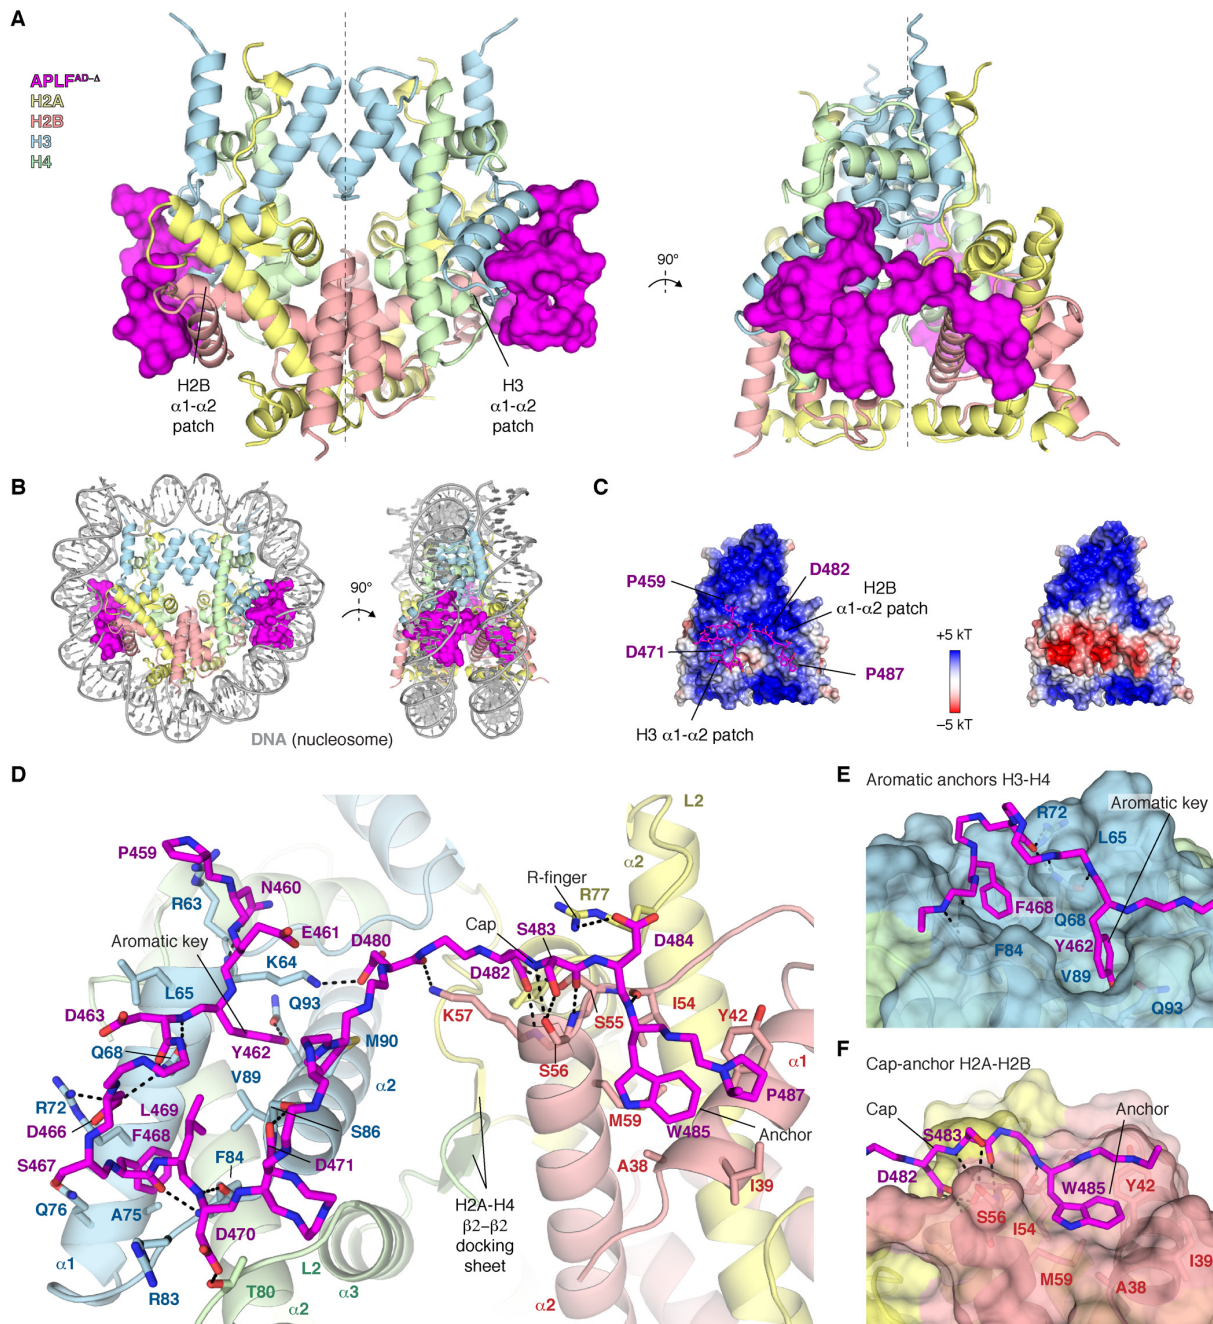

128

129 **Fig. 2 | APLF<sup>AD-Δ</sup> binds H2A-H2B and H3-H4 as a histone octamer.** **A**, Ribbon view of the crystal structure of the  
 130 APLF<sup>AD-Δ</sup>-histone octamer complex with APLF<sup>AD-Δ</sup> (APLF<sup>AD</sup> res. 449-490) shown as surface. Each APLF<sup>AD-Δ</sup> binds  
 131 primarily to the H2B and H3 α1-α2 patches (indicated) in each half-octamer. The pseudo-dyad axis is indicated  
 132 with a dotted line. Color coding indicated in the Figure. **B**, Superposition of the APLF<sup>AD</sup>-histone octamer complex  
 133 and nucleosomal DNA highlighting the correspondence with the nucleosome structure and that APLF<sup>AD</sup> blocks  
 134 binding sites of both DNA gyres in the nucleosome. **C**, Electrostatic surface potential of the histone octamer (left)  
 135 and the APLF<sup>AD-Δ</sup>-octamer complex (right), showing that APLF<sup>AD-Δ</sup> binds the positively charged histone surface  
 136 and creates a pronounced negatively charged bulk. **D**, Zoom on the APLF<sup>AD</sup>-histone octamer interface. Hydrogen  
 137 bonds indicated as dashed lines; interface residues, the H2A-H4 docking β-sheet and known histone dimer  
 138 binding motifs are labeled. **E,F** Zoom on the interaction of APLF<sup>AD</sup> with H3-H4 (**E**) and H2A-H2B (**F**).

139 *APLF<sup>AD</sup> envelops the histone octamer with its C-terminal region*

140 We next examined the binding mode of the full APLF<sup>AD</sup> to full-length histones in solution using NMR  
141 and MS. NMR titration experiments of the octamer-mix to APLF<sup>AD</sup> resulted in drastic peak intensity  
142 losses for all APLF<sup>AD</sup> residues, except the N-terminal ten residues (Fig. 3A and Fig. S11). This suggests  
143 that the C-terminal residues 488-511, which are missing in the crystal structure, are also involved in  
144 binding, while the N-terminal region remains highly flexible in the complex. As the bound APLF<sup>AD</sup> was  
145 not observable by NMR directly, we probed its conformation using relaxation dispersion experiments,  
146 exploiting the continuous interconversion of free and bound states. These experiments indicated that  
147 residues involved in H2A-H2B and H3-H4 binding experience significant changes in their chemical  
148 environment between free and bound states (Fig. 3B), supporting the crystal structure binding mode.  
149 Moreover, the fitted chemical shift differences indicate that residues in the C-terminal region are  
150 similarly engaged in binding and undergo a concerted binding event with the H2A-H2B and H3-H4  
151 binding motifs (Fig. 3B and Fig. S11). This is further supported by cross-linking MS (XL-MS) experiments  
152 revealing reproducible cross-links between lysine residues within the APLF<sup>AD</sup> C-terminal region and  
153 the H2B  $\alpha$ C-helix (Fig. 3C). By including the NMR and XL-MS data, we extended the APLF<sup>AD- $\Delta$</sup> -histone  
154 octamer crystal structure into a model of the full-length APLF<sup>AD</sup> bound to the histone octamer. The  
155 residues missing in the crystal structure were built in random coil conformation while imposing a  
156 maximum 27 Å C $\alpha$ -C $\alpha$  distance for the cross-linked residues in the APLF<sup>AD</sup> C-terminal region and the  
157 H2B  $\alpha$ C-helix. These restraints are compatible with a wide range of conformations of the C-terminal  
158 region in the final model, all in close proximity to the H2B  $\alpha$ C-helix (Fig. 3D and Fig. S11). APLF<sup>AD</sup> thus  
159 envelops the histone octamer completely, except for the central region around the dyad. In this  
160 binding mode, APLF<sup>AD</sup> could influence the DNA interactions of the histone octamer and favor DNA  
161 binding at the dyad, the central region in the nucleosome.

162

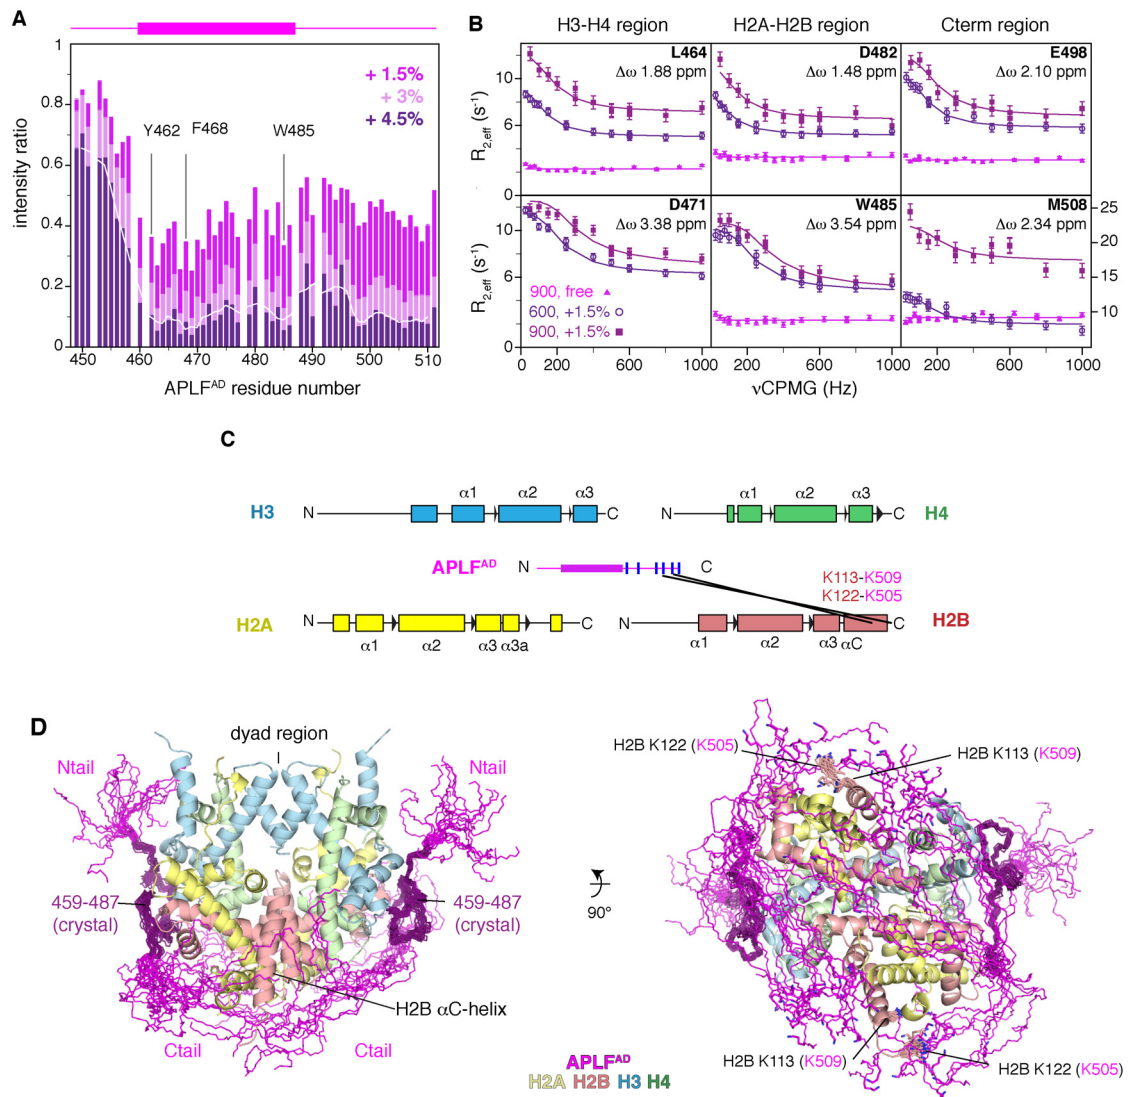

163

164 **Fig. 3 | APLF<sup>AD</sup> including the N- and C-terminal tails envelops the histone octamer.** **A**, Relative NMR peak  
 165 intensities of APLF<sup>AD</sup> upon addition of octamer-mix show similar signal intensity decrease for the C-terminal  
 166 region (residues 488-511) as for the histone binding region, indicating it is bound to the octamer surface. The 3-  
 167 residue moving average intensity for the +4.5% data is shown as a white line. The APLF<sup>AD</sup> fragment visible in the  
 168 crystal structure is shown as a purple box on top of the Figure. Selected residues are labeled. **B**, Residues in the  
 169 C-terminal region experience significant changes in their chemical environment and undergo a concerted  
 170 binding event with the H2A-H2B and H3-H4 binding motifs, based on fitting of NMR relaxation dispersion data  
 171 (see Fig. S11). **C**, The APLF<sup>AD</sup> C-terminal region is in proximity of H2B as based on analysis of intermolecular lysine  
 172 cross-links (black lines) in the APLF<sup>AD</sup>-histone octamer complex identified by mass spectrometry. Secondary  
 173 structures of the histones are indicated. The APLF<sup>AD</sup> fragment visible in the crystal structure is shown as a purple  
 174 box. Lysine residues within APLF<sup>AD</sup> are indicated as blue lines. **D**, Superposition of the twenty best ranking models  
 175 of the (APLF<sup>AD</sup>-H2A-H2B-H3-H4)<sub>2</sub> complex, showing that APLF<sup>AD</sup> covers most of the DNA binding surface on the  
 176 histone octamer with exception of the dyad region. The crystallized part of APLF<sup>AD</sup> is shown in dark purple, the



177 APLF<sup>AD</sup> N- and C-terminal tails in magenta are modeled based on the intermolecular cross-links (cross-linked H2B  
178 residues shown as sticks and labeled in the right panel, APLF<sup>AD</sup> residues in brackets).

179

180 *APLF<sup>AD</sup> aromatic anchors are critical for histone octamer binding in vitro and in cells*

181 To test the importance of the H2A-H2B and H3-H4 interactions of APLF<sup>AD</sup> for binding and chaperoning  
182 of the histone octamer, we mutated the aromatic anchor residues that are involved in binding based  
183 on the octamer complex structure or implicated in binding isolated H2A-H2B(14) or H3-H4 (Fig. S2).  
184 We used double anchor mutants to disrupt either the H3-H4 interface (Y462A/F468A, DA-34) or the  
185 H2A-H2B interface (Y476A/W485A, DA-AB), and a quadruple anchor (QA) mutant that combines these  
186 mutations (see Table S3 for an overview of the mutants). Indeed, these mutations reduced the binding  
187 affinity of APLF<sup>AD</sup> to the octamer-mix up to five-fold (Fig. 4A). Additionally, removal of the anchor  
188 residues resulted in a large decrease of binding enthalpy, suggesting a reduction in buried surface and  
189 thus a defect in assembly of the histone octamer (Fig. S12). Though deletion of the C-terminal region  
190 ( $\Delta$ ) did not affect binding affinity to the octamer-mix, reduced binding affinity and enthalpy was  
191 observed when the deletion was combined with the QA mutant (QA- $\Delta$ ) (Fig. 4A) These data further  
192 indicate that the C-terminal region is involved in weak, dynamic interactions with the histone surface.  
193 To further probe the importance of the aromatic anchor residues for chaperone activity we tested  
194 wild-type and mutant APLF<sup>AD</sup> in their ability to prevent non-native histone-histone contacts using XL-  
195 MS. As expected, for the octamer-mix alone, most histone-histone cross-links obtained are  
196 incompatible with the histone octamer structure (Fig. 4B). Strikingly, addition of wild-type APLF<sup>AD</sup>, but  
197 not aromatic anchor mutants, dramatically reduced the number of incompatible cross-links, further  
198 substantiating that APLF<sup>AD</sup> functions as a histone chaperone and stabilizes the core histones in their  
199 nucleosomal octameric arrangement (Fig. 4B).

200

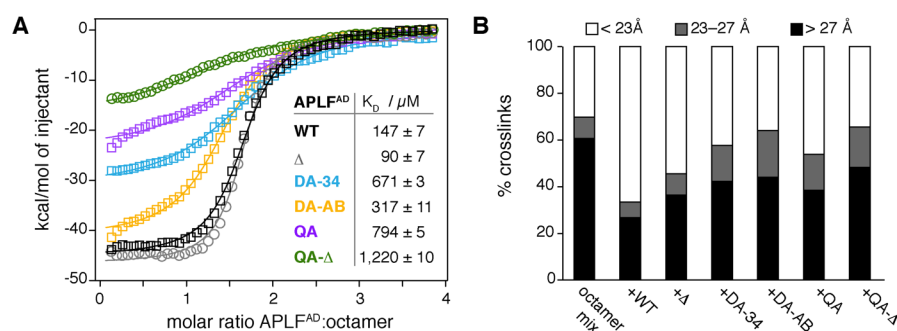

201

202 **Fig. 4 | APLF<sup>AD</sup> aromatic anchor residues are required for histone octamer assembly and chaperone activity in**  
203 **vitro. A, ITC binding curves and derived affinities ( $K_D$ ) of APLF<sup>AD</sup> wild-type (WT), the truncation mutant used for**

204 crystallization (APLF<sup>AD-Δ</sup>, Δ) or the double (Y462A/F468A = DA-34; Y476A/W485A = DA-AB) and quadruple  
205 (Y462A/F468A/Y476A/W485A = QA) mutants titrated to octamer-mix. **B**, Percentage of octamer-compatible and  
206 -incompatible histone-histone lysine cross-links based on surface accessible C $\alpha$ -C $\alpha$  distances in the nucleosomal  
207 structure (PDB:2PYO) identified by XL-MS.

208

209 Our data show that the APLF acidic domain binds the histone octamer and we identify specific  
210 aromatic residues crucial for this interaction. We therefore wondered if this binding occurs in cells  
211 and how it affects APLF function during DNA damage. Consistent with previous results(13), we found  
212 that histone binding in cells is dependent on the presence of the acidic domain, using  
213 immunoprecipitation pulldown assays in the presence of benzonase (Fig. 5A,B). Mutation of the  
214 aromatic anchors in the DA-34 and DA-AB mutants result in both reduced H3-H4 and H2A-H2B binding.  
215 Combined mutation of all anchors in the QA construct was sufficient to fully abrogate all histone  
216 binding, indicating that the aromatic anchor interactions as captured in the crystal structure are crucial  
217 for APLF's histone binding in cells. These data indicate that APLF may engage histone octamers rather  
218 than separate H3-H4 or H2A-H2B units, and they also suggest that H3-H4 and H2A-H2B binding may  
219 be interlinked in cells, consistent with the handling of octamers.

220 Previous work also showed that deletion of the acidic domain interferes with recruitment of APLF at  
221 DNA damage sites(13). Under conditions where accumulation of the DNA double-strand break marker  
222 NBS1 is clearly visible, we found that the acidic domain deletion mutant shows strongly reduced  
223 accumulation level at DNA damage sites (Fig. 5C,D). This effect is retained in the QA mutant, in  
224 agreement with the crucial role of the aromatic anchors for the function of the acidic domain in  
225 histone binding (Fig. 5A,B). The DA-AB and DA-34 mutants, which have only impaired histone octamer  
226 binding (see Fig 5A,B), showed no change in recruitment level. This suggests that their residual histone  
227 binding is sufficient to support accumulation at DNA damage sites. Together, these results indicate  
228 that APLF's ability to bind the histone octamer is critical for its recruitment and retention at sites of  
229 DNA damage, thereby likely impacting DNA damage repair.

230

231

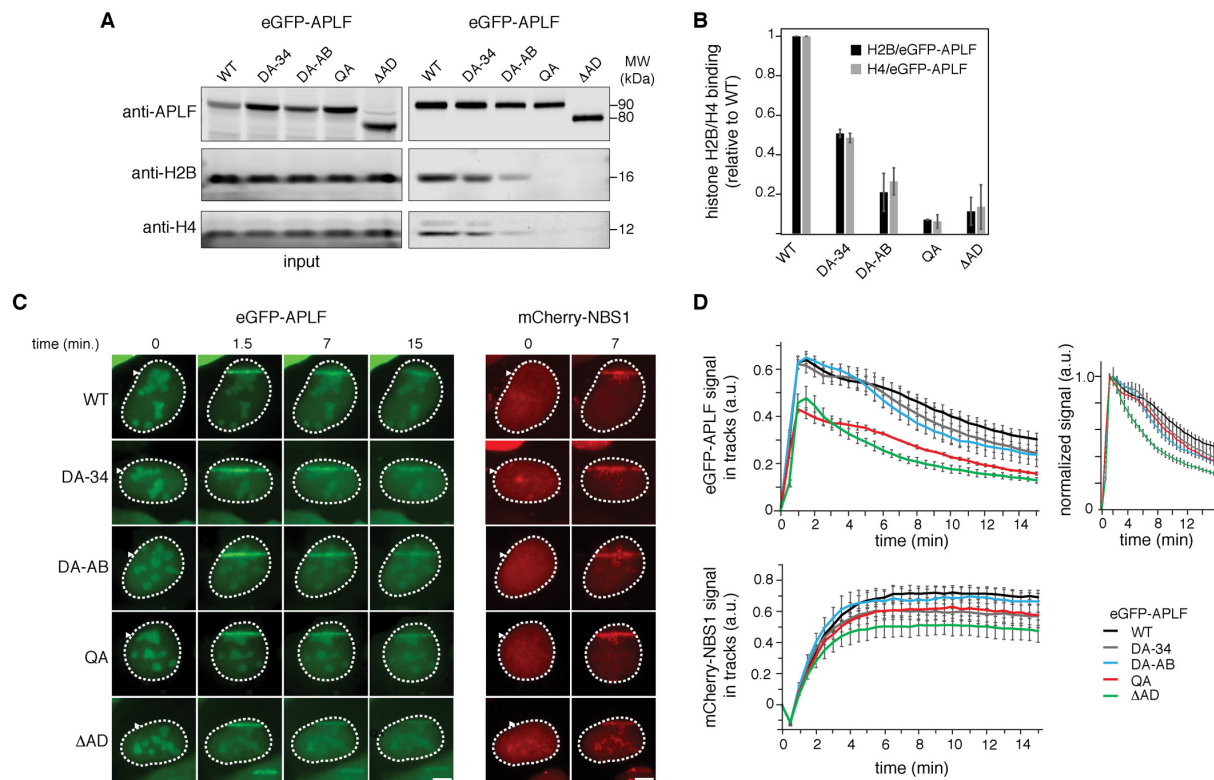

232

233 **Fig 5. | APLF<sup>AD</sup> aromatic anchor residues are required for histone binding and recruitment to DNA damage**  
 234 **sites in cells. A**, Pull-downs of eGFP-APLF wild-type (WT), DA-34 (Y462A/F468A), DA-AB (Y476A/W485A), QA  
 235 (Y462A/F468A/Y476A/W485A), or ΔAD (acidic domain deletion) mutant in the presence of benzonase following  
 236 transient expression in U2OS cells. Blots were probed for GFP, H2B and H4. **B**, Average normalized H2B or H4  
 237 signal (with standard deviation) of duplicate pull-down results. Signals of H2B or H4 were normalized to that for  
 238 eGFP-APLF WT or mutant protein level, then normalized to that of WT, which was set to 1. **C**, Live-cell imaging  
 239 of the recruitment of eGFP-APLF WT, DA-34, DA-AB, QA or ΔAD mutant to DNA damage tracks generated by UV-  
 240 A laser micro-irradiation in BrdU-sensitized U2OS cells (left panel). mCherry-NBS1 was co-transfected with eGFP-  
 241 APLF. Live-cell imaging of the recruitment of mCherry-NBS1 in these cells is shown (right panel). Representative  
 242 images are shown. Scale bars: 5μm. **D**, Quantification of the recruitment of eGFP-APLF WT or mutant protein  
 243 (top left panel), and mCherry-NBS1 (bottom panel) to DNA damage tracks in cells from **C**. Normalized data in top  
 244 right panel highlights relative differences in release kinetics. Data represent the mean values ± standard error  
 245 of the mean (SEM) from 50 WT- or 30 mutant eGFP-APLF-expressing cells acquired in 3 independent  
 246 experiments.

247

248 *APLF<sup>AD</sup> chaperones the histone octamer to promote nucleosome assembly*

249 Having established that APLF binds the histone octamer in vitro and in cells, we investigated whether  
 250 APLF can deposit octamers on DNA to form nucleosomes, possibly to restore chromatin after DNA  
 251 damage repair. We first tested if APLF<sup>AD</sup> prevents non-native histone-DNA contacts, as expected for a

252 histone chaperone(1), using a precipitation-rescue assay(14, 28). Indeed, APLF<sup>AD</sup> rescued the  
253 precipitation of histones on DNA in a way that depends on the presence of the key aromatic anchor  
254 residues (Fig. 6A). This demonstrates that APLF<sup>AD</sup> functions as a *bona fide* histone chaperone using the  
255 binding mode observed in the crystal structure. Next, we tested whether APLF<sup>AD</sup> facilitates  
256 nucleosome formation. Using the nucleosome assembly and quantitation (NAQ) assay(29), we  
257 monitored nucleosome formation upon incubation of the octamer-mix with 207 bp DNA fragments in  
258 the presence of APLF<sup>AD</sup>, followed by digestion with micrococcal nuclease (MNase). Addition of APLF<sup>AD</sup>  
259 to the histones caused increased protection of DNA fragments of 125-160 bp in a dose-dependent  
260 manner, consistent with nucleosome formation (Fig. 6B,D and Fig. S13). Together, these data indicate  
261 that APLF<sup>AD</sup> prevents spurious histone-DNA interactions and allows deposition of the histone octamer  
262 on DNA to form nucleosomes.

263 We next sought to understand how APLF<sup>AD</sup> may deposit octamers on DNA. As APLF<sup>AD</sup> does not cover  
264 the entire DNA binding surface of the histone octamer (see model in Fig. 3), we hypothesized that the  
265 APLF<sup>AD</sup>-octamer complex would be able to bind a short piece of DNA, forming a ternary APLF<sup>AD</sup>-  
266 octamer-DNA complex representing a reaction intermediate during octamer deposition. Using  
267 fluorescently labeled proteins and cross-linking to trap transient complexes, we confirmed that APLF<sup>AD</sup>  
268 alone does not bind DNA (Fig. 6D,E lane 2 vs. 3), while addition of a 49-bp DNA fragment to the histone  
269 octamer-mix alone resulted in precipitation (Fig. 6D,E lane 9). Upon incubation of the APLF<sup>AD</sup>-histone  
270 octamer complex with the DNA fragment, we detected a ternary complex containing DNA, histone  
271 octamer, and APLF<sup>AD</sup> (Fig. 6D,E marked band in lane 4 and 6 and Fig. S14). Importantly, this ternary  
272 complex is not formed when using the APLF<sup>AD</sup> QA mutant (Fig. 6D,E lane 8), indicating that in absence  
273 of proper APLF<sup>AD</sup>-histone binding the intermediate cannot be formed. Moreover, in the presence of a  
274 longer 147-bp DNA fragment the ternary complex could not be detected, but only DNA-histone  
275 complexes (Fig. S15), in line with the octamer being deposited on this longer DNA (as in Fig. 6B) and  
276 APLF<sup>AD</sup> leaving the nucleosome product. Therefore, the APLF<sup>AD</sup>-octamer-DNA complex isolated with a  
277 short DNA fragment may represent an intermediate in the octamer deposition process by APLF.

278

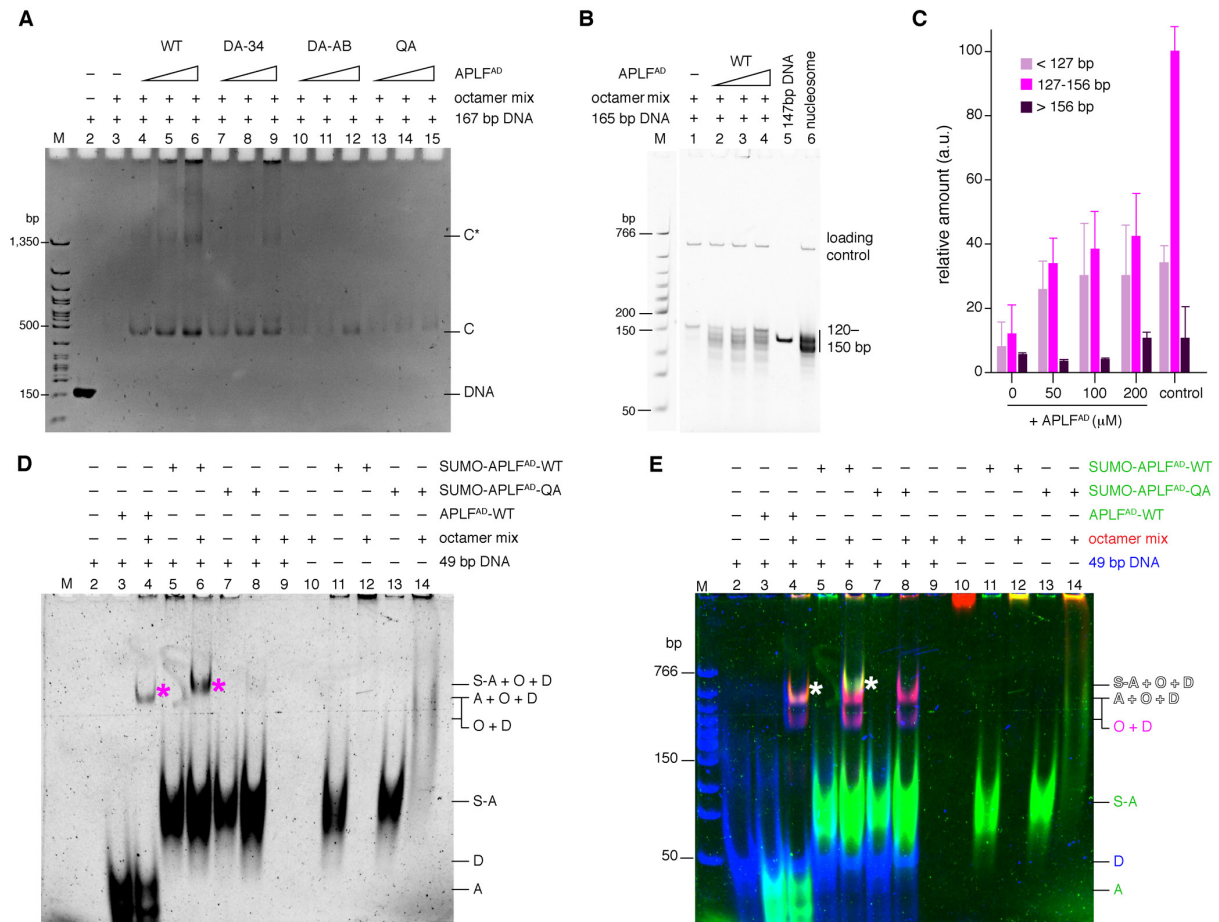

279

280 **Fig. 6 | APLF<sup>AD</sup> chaperones the histone octamer to promote nucleosome assembly.** **A**, Native PAGE analysis of  
 281 precipitation-rescue assay showing formation of soluble protein-DNA complexes (bands 'C' and 'C\*') upon  
 282 addition of increasing amounts of WT APLF<sup>AD</sup> to octamer-mix with DNA, which is strongly reduced for mutant  
 283 APLF<sup>AD</sup>. Band 'C' corresponds to the electrophoretic mobility of nucleosomes (Fig. S13). Total DNA control shown  
 284 in lane 2. **B,C** NAQ results showing MNase digestion products obtained for octamer-mix with DNA and increasing  
 285 amounts of APLF<sup>AD</sup>. Quantification of DNA digestion products (average and standard error of the mean (*n*=3)) in  
 286 panel **C**. APLF<sup>AD</sup> increases the protected nucleosomal bands (127-156 bp) (*p* = 0.018, 0.018, 0.016 for 50, 100,  
 287 200 μM) according to a one-tailed Student's *t*-test. Salt-assembled nucleosomes are used as control. **D,E** Native  
 288 PAGE analysis of indicated mixtures of APLF<sup>AD</sup>, octamer-mix and DNA, crosslinked with DSS. Panel **D** shows the  
 289 Cy3-scan with APLF<sup>AD</sup> signal before DNA staining, panel **E** shows a merged image of the APLF<sup>AD</sup> (green), histone  
 290 (red) and DNA (blue) scans (see Fig. S14 for individual scans). APLF<sup>AD</sup> forms a ternary complex with histones and  
 291 DNA (asterisk in lane 3 and 6). SUMO-APLF<sup>AD</sup> was used as control to shift the ternary band above the background  
 292 octamer-DNA complex. A = APLF<sup>AD</sup>, S-A = SUMO-APLF<sup>AD</sup>, O = histone octamer, D = DNA. Labels in **E** are color-  
 293 coded according to the fluorescent dye.

294

295

296

297 Together, these data lead to a compelling model for nucleosome formation by APLF<sup>AD</sup> that contrasts  
298 sharply with the stepwise nucleosome assembly pathway used by the other ATP-independent histone  
299 chaperones characterized so far(30) (Fig. 7). Our data showed that APLF<sup>AD</sup>, as a flexible and disordered  
300 protein, can bind both H2A-H2B and H3-H4 simultaneously, tethering them into a histone octamer in  
301 its nucleosomal configuration. In the complex, APLF<sup>AD</sup> stabilizes the histone octamer and prevents  
302 non-native histone-DNA interactions. We propose that the exposed histone dyad region, where the  
303 octamer has highest affinity for DNA(31) and where DNA binding stabilizes the H3-H3' interface of the  
304 (H3-H4)<sub>2</sub> tetramer, allows the interaction with DNA to initiate octamer deposition. The DNA may then  
305 displace APLF<sup>AD</sup> as it wraps around the histone octamer to form the nucleosome (Fig. 7). Notably, the  
306 APLF acidic domain is flexible and exposed within the core NHEJ complex(11), which can contain two  
307 copies of APLF through binding the DNA-end binding protein Ku80(12). The acidic domain of APLF  
308 could thus provide the NHEJ machinery with the capacity to assemble or capture histone octamers,  
309 store them during the DNA repair process, and to promote nucleosome assembly to restore chromatin  
310 after repair. As APLF binds conserved surfaces on the histones, it can likely also assemble histone  
311 octamers containing histone variants, consistent with identification of H2A.X and macroH2A in co-  
312 immuno-precipitation experiments with APLF(13). Furthermore, as APLF can bind PARylated histones  
313 through its PBZ domains, PAR binding could assist APLF's ability to bind histones and stimulate APLF's  
314 histone octamer chaperone activity. It is tempting to speculate that APLF could capture PARylated  
315 histones that are evicted from chromatin, and then assemble these via its acidic domain into histone  
316 octamers.

317

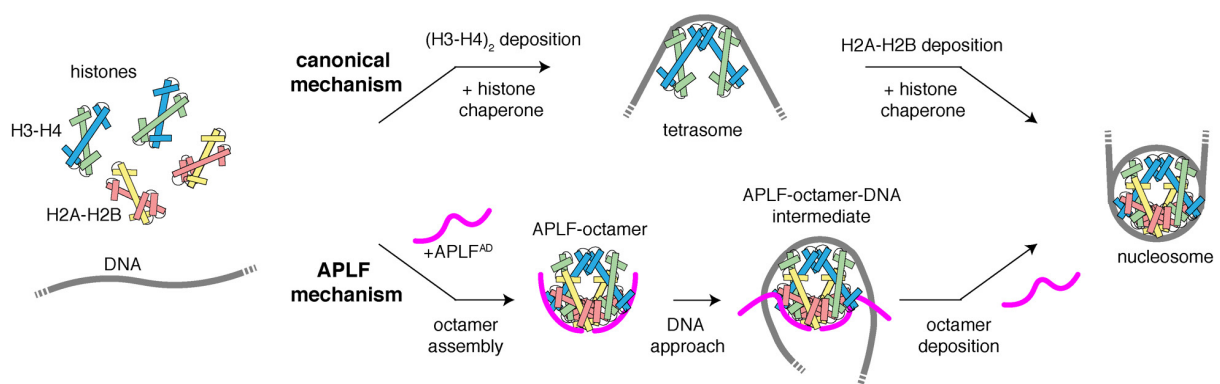

318

319 **Fig. 7 | Model of the proposed histone chaperone mechanism by APLF.** APLF<sup>AD</sup> assembles H2A-H2B and H3-H4  
320 simultaneously in an octameric configuration, and deposits them on DNA using a transient ternary intermediate.  
321 This contrasts with the stepwise nucleosome assembly where (H3-H4)<sub>2</sub> deposition precedes H2A-H2B.

322

323 While many IDRs form fuzzy complexes where interactions are not well-defined, we find that APLF<sup>AD</sup>  
324 forms specific and defined interactions that enable it to chaperone the histone octamer. Comparison  
325 of our data obtained for binding H2A-H2B alone (ref. (14)) and here on binding the histone octamer  
326 suggest that there can be a degree of fuzziness in the APLF<sup>AD</sup>-histone interaction, depending on the  
327 exact histone substrate: Y476 is important for high-affinity H2A-H2B binding but is not involved in  
328 histone octamer binding as judged from the crystal structure of the (APLF<sup>AD-Δ</sup>-H2A-H2B-H3-H4)<sub>2</sub>  
329 complex. To what extent such adaptability is relevant for APLF function needs further investigation.

330 By tethering H2A-H2B and H3-H4 in their native nucleosomal configuration, APLF adds a remarkable  
331 new mode of action in the repertoire of histone chaperones. Our data demonstrates that histone  
332 octamer assembly can be uncoupled from nucleosome assembly and can be controlled by a single  
333 histone chaperone. Interestingly, while many histone chaperones contain acidic stretches(32),  
334 sequence analysis based on the presence of the key aromatic anchor residues revealed no clear  
335 candidates for a chaperone with similar histone octamer chaperone activity as APLF<sup>AD</sup> (Fig. S16). It will  
336 be interesting to investigate whether some may nevertheless retain this function, and whether two  
337 histone chaperones may work together to chaperone the octamer by binding to each other, and how  
338 this is regulated. We speculate that chaperoning of octamers may be a more widespread mechanism  
339 to maintain H3-H4 as well as H2A-H2B with their modifications and variants within the same  
340 nucleosome, during temporary chromatin disassembly throughout the genome.

341

## 342 **Materials and Methods**

343

### 344 **Data reporting**

345 No statistical methods were used to predetermine sample size. The experiments were not  
346 randomized, and the investigators were not blinded to allocation during experiments and outcome  
347 assessment.

348

### 349 **Constructs, expression, and purification of APLF<sup>AD</sup>**

350 The acidic domain of *Hs.* APLF (APLF<sup>AD</sup>, residues 450-511) was expressed and purified from a pLIC\_His-  
351 GST-APLF<sup>AD</sup> plasmid. Mutations were introduced using site-directed mutagenesis and verified by DNA  
352 sequencing. The quadruple mutant Y462A/F468A/Y476A/W485A (QA) and the truncated QA mutant  
353 (QA-Δ, residues 450-490), like all proteins for the chaperone assay, were expressed as fusion protein  
354 with a N-terminal SUMO-tag from a pET29b\_SUMO-APLF<sup>AD</sup> construct containing a His-tag and TEV  
355 cleavage site N-terminal to SUMO. Expression and purification were carried out as previously

356 described with minor modifications(14). Briefly, APLF<sup>AD</sup> (or SUMO-APLF<sup>AD</sup>) was expressed in BL21  
357 Rosetta2 (DE3) cells (Novagen) at 30 °C. For NMR experiments, cells were cultured in M9 minimal  
358 medium in H<sub>2</sub>O containing <sup>15</sup>NH<sub>4</sub>Cl for <sup>15</sup>N-labeled APLF<sup>AD</sup>, or in D<sub>2</sub>O with <sup>15</sup>NH<sub>4</sub>Cl and <sup>13</sup>C<sub>6</sub>D<sub>7</sub>-glucose  
359 for perdeuterated <sup>15</sup>N,<sup>13</sup>C-labeled APLF<sup>AD</sup>. After harvesting and lysis by freeze-thaw and sonification,  
360 soluble His-GST-APLF<sup>AD</sup> (or His-SUMO-APLF<sup>AD</sup>) was loaded on a 5 mL HisTrap FF column (GE Healthcare  
361 Life Sciences), pre-equilibrated in lysis buffer (50 mM Tris, pH 8.0, 150 mM NaCl, 5 mM β-  
362 mercaptoethanol (BME), 20 mM imidazole), washed with lysis buffer, and eluted with a gradient of  
363 20-500 mM imidazole in lysis buffer. The fusion protein was then cleaved with TEV protease (produced  
364 in-house) at 4 °C, typically overnight, and after complete cleavage, APLF<sup>AD</sup> (or SUMO-APLF<sup>AD</sup>) was  
365 further purified by anion exchange on a 5 ml HiTrap Q HP column (GE Healthcare Life Sciences) in 20  
366 mM Tris, pH 7.5, 5 mM BME, 1 mM EDTA with a salt gradient from 150 mM to 1 M NaCl. Fractions  
367 containing APLF<sup>AD</sup> (or SUMO-APLF<sup>AD</sup>) were pooled, supplemented with MgCl<sub>2</sub> (1.1 mM final  
368 concentration), and applied on a 5 mL HisTrap FF column (GE Healthcare Life Sciences) to remove  
369 residual His-tagged protein. The final purified APLF<sup>AD</sup> (or SUMO-APLF<sup>AD</sup>) was pooled, buffer-exchanged  
370 to assay buffer (25 mM NaPi, pH 7.0, 300 mM NaCl) using a 3 kDa (or 10 kDa) molecular weight cut-  
371 off (MWCO) Amicon Ultra Centrifugal Filter Unit (Merck Millipore), and used directly or aliquoted,  
372 flash-frozen in liquid nitrogen and stored at -20 °C until further use.

373

374

375

### 376 **Histone production**

377 Experiments were carried out with full-length *Drosophila melanogaster* (*Dm*) histones, except when  
378 noted otherwise. For crystallography, tailless *Xenopus laevis* (*Xl*) histones were used. Full-length *Dm*.  
379 histones H2A, H2B, H3, and H4 in pET21b plasmids and tailless *Xl*. H2A (residues 13-118), H2B (residues  
380 24-122), and H4 (residues 20-102) in pET3a plasmids, and H3 (residues 38-135) in a pDEST plasmid  
381 were expressed in BL21 Rosetta2 (DE3) cells (Novagen) and purified from inclusion bodies as  
382 previously described except for minor modifications for the purification of tailless histones(14, 33).  
383 For NMR experiments on H3-H4, histone H3 was isotope-labeled by expression in M9 minimal medium  
384 in D<sub>2</sub>O with <sup>15</sup>NH<sub>4</sub>Cl and <sup>13</sup>C<sub>6</sub>D<sub>7</sub>-glucose. Briefly, after isolation of the inclusion bodies, solubilized  
385 histones were purified under denaturing conditions in two steps using size-exclusion and cation-  
386 exchange chromatography. First, histones were purified on a gel filtration column HiLoad Superdex 75  
387 pg (GE Healthcare Life Sciences) pre-equilibrated with histone gel-filtration buffer (HGFB) (50 mM  
388 NaPi, pH 7.5, 5 mM BME, 1 mM EDTA, 7 M urea) with 150 mM NaCl (HGFB150) or, for tailless H4, 1 M  
389 NaCl (HGFB1000). Histone containing fractions were pooled and, for tailless histones H2A and H3,



390 adjusted to a final NaCl concentration of 12.5 mM using HGFB, or, for tailless H4, using sodium acetate  
391 urea buffer (SAUB) (20 mM NaOAc, pH 5.2, 5 mM BME, 1 mM EDTA, 7 M urea). Histones were then  
392 further purified by cation exchange on a 5 ml HiTrap SP HP column (GE Healthcare Life Sciences), pre-  
393 equilibrated with HGFB150 (full-length histones and tailless H2B), HGFB (tailless H2A and H3) or SAUB  
394 (tailless H4). After a wash step, histones were eluted with a linear gradient of NaCl to 1 M in HGFB or  
395 SAUB. Histone containing fractions were pooled, concentrated, supplemented with 1 mM lysine (final  
396 concentration) and stored at -20 °C.

397

### 398 **601-DNA production**

399 A high-copy number plasmid containing 12 tandem repeats of a 167 base pair strong positioning DNA  
400 sequence (Widom's 601(34, 35)) was transformed into DH5 $\alpha$  cells. The plasmid was purified using a  
401 QIAGEN Plasmid Giga Kit. The 167-bp fragment was released from the vector by Scal (Thermo Fisher  
402 Scientific) digestion and purified by anion exchange.

403

### 404 **Preparation of histone complexes**

405 Histones were refolded and purified as previously described with minor changes(14, 33). Briefly,  
406 histone proteins were unfolded in 50 mM Tris, pH 7.5, 100 mM NaCl, 10 mM dithiothreitol (DTT), 6 M  
407 guanidine hydrochloride, mixed in equimolar ratios to a final protein concentration of 1 mg/ml, then  
408 dialyzed at 4 °C overnight to 10 mM Tris-HCl, pH 7.5, 1 mM EDTA, 5 mM BME, 2 M NaCl, followed by  
409 size-exclusion chromatography at 4 °C on a HiLoad Superdex 200 pg (GE Healthcare Life Sciences)  
410 column pre-equilibrated in the same buffer. For experiments using the stoichiometric core-histone  
411 mix (octamer-mix), the purified histone complexes were exchanged to assay buffer (25 mM NaPi, pH  
412 7.0, 300 mM NaCl) using a 10 kDa MWCO Amicon Ultra Centrifugal Filter Unit (Merck Millipore).  
413 Complexes were aliquoted, flash frozen in liquid nitrogen and stored at -20 °C. Concentrations of H3-  
414 H4 are always given as concentration of dimers. Unless noted otherwise, concentrations of the  
415 octamer-mix are expressed as the equivalent histone octamer concentration, i.e., 10  $\mu$ M octamer-mix  
416 equals 20  $\mu$ M H2A-H2B and 20  $\mu$ M H3-H4, corresponding to an equivalent histone octamer  
417 concentration of 10  $\mu$ M.

418

### 419 **Analytical gel filtrations**

420 Analytical gel filtrations were conducted in assay buffer (25 mM NaPi, pH 7.0, 300 mM NaCl) at room  
421 temperature. Histone complexes (20  $\mu$ M H2A-H2B, 20  $\mu$ M H3-H4, or 10  $\mu$ M octamer-mix) were mixed  
422 with APLF<sup>AD</sup>, incubated for 30 min on ice, centrifuged to remove aggregates and then loaded on a  
423 Superdex 200 Increase 10/300 GL column (GE Healthcare Life Sciences) equilibrated in assay buffer

424 and run at room temperature. Molar ratios of histone complex to APLF<sup>AD</sup> ranged from 1:0 to 1:2 for  
425 H2A-H2B to APLF<sup>AD</sup>, 1:1.5 for H3-H4 to APLF<sup>AD</sup>, and 1:4 for histone octamer equivalent to APLF<sup>AD</sup>, as  
426 indicated in Fig. S3. The chromatogram in Fig. 1D is taken at 1:2 histone octamer equivalent to APLF<sup>AD</sup>.  
427

#### 428 **Isothermal titration calorimetry**

429 Calorimetric titrations were conducted in assay buffer (25 mM NaPi, pH 7.0, 300 mM NaCl) at 25 °C  
430 using a MicroCal VP-ITC microcalorimeter (Malvern Panalytical). Calorimetric titrations of APLF<sup>AD</sup> to  
431 H2A-H2B were described previously in ref. (14). For comparison between histone complexes, 10 μM  
432 H2A-H2B, 10 μM H3-H4 or 5 μM octamer-mix was used in the sample cell and titrated with 90 μM  
433 APLF<sup>AD</sup> in the injection syringe. For binding comparison between H3-H4 and APLF<sup>AD</sup> mutants, 20 μM  
434 H3-H4 in the cell was titrated with 180 μM APLF<sup>AD</sup> in the syringe. For binding comparison between  
435 octamer-mix and APLF<sup>AD</sup> mutants, 5 μM octamer-mix in the cell was titrated with 90 μM APLF<sup>AD</sup> in the  
436 syringe. APLF<sup>AD</sup> QA and QA-Δ mutants contained an N-terminal SUMO-tag for concentration  
437 determination. Comparison of ITC data on APLF<sup>AD</sup> wild-type with and without SUMO-tag revealed little  
438 differences (Fig. S15). Binding isotherms were generated by plotting the heat change of the binding  
439 reaction against the ratio of total concentration of APLF<sup>AD</sup> to total concentration of histone complexes.  
440 To allow direct comparison between H2A-H2B, H3-H4 and octamer-mix, the concentration of histone  
441 complexes was expressed as the total concentration of histone dimers, i.e., 5 μM octamer-mix  
442 corresponds to 10 μM H2A-H2B and 10 μM H3-H4, which equals 20 μM histone dimers. For  
443 comparison between APLF<sup>AD</sup> mutants, the octamer-mix concentration was expressed as the  
444 equivalent histone octamer concentration. The enthalpy of binding ( $\Delta H$ , kcal mol<sup>-1</sup>) was determined  
445 by integration of the injection peaks (5 μL) and correction for heats of dilution were determined from  
446 identical experiments without histone complexes. The entropy of binding ( $\Delta S$ ), the stoichiometry of  
447 binding ( $n$ ), and the dissociation constant ( $K_D$ ) were determined by fitting the resulting corrected  
448 binding isotherms by nonlinear least-squares analysis to a one set of sites binding model using the  
449 Origin software (MicroCal, Inc.). Errors in fit parameters are the standard errors derived from the  
450 regression analyses as reported by the software.

451

#### 452 **Native mass spectrometry**

453 Complexes of histones and APLF<sup>AD</sup> were prepared by mixing H2A-H2B or H3-H4 and APLF<sup>AD</sup> in assay  
454 buffer (25 mM NaPi, pH 7.0, 300 mM NaCl) at a ratio of 1:1 histone dimer:APLF<sup>AD</sup>. The H2A-H2B-APLF<sup>AD</sup>  
455 complex was purified on a Superdex 200 Increase 10/300 GL column (GE Healthcare Life Sciences)  
456 equilibrated in assay buffer and run at room temperature. Octamer-mix and APLF<sup>AD</sup> were mixed in  
457 assay buffer at a ratio of equivalent to 1:0.25 to 1:3 histone octamer to APLF<sup>AD</sup> and used without

458 further purification. The mass spectrum in Fig. 1G is taken at 1:0.25 histone octamer equivalents to  
459 APLF<sup>AD</sup>. For each condition, a 20  $\mu$ L sample at 20  $\mu$ M concentration of complex (H2A-H2B- and H3-  
460 H4-APLF<sup>AD</sup>) or at 20  $\mu$ M octamer-mix was buffer exchanged into 50 mM (H2A-H2B- and H3-H4-APLF<sup>AD</sup>)  
461 or 300 mM (octamer-mix + APLF<sup>AD</sup>) ammonium acetate at pH 7.5 using 3 kDa MWCO Amicon Ultra  
462 Centrifugal Filter Units (Merck Millipore). After buffer exchange the volume of each sample was  $\sim$ 40  
463  $\mu$ L. The samples were then measured at the Exactive Plus EMR (Thermo Fisher Scientific) and the  
464 masses for each protein complex determined manually by minimization of the error over the charge  
465 state envelope from the different charge-state assignments.

466

### 467 **Cross-linking mass spectrometry**

468 The stoichiometric core-histone mix (octamer-mix) and APLF<sup>AD</sup> were mixed in assay buffer (25 mM  
469 NaPi, pH 7.0, 300 mM NaCl) at a ratio of equivalent to 1:0.25 to 1:2.5 histone octamer to APLF<sup>AD</sup>. The  
470 complex formed in the 1:2.5 mixture was purified on a Superdex 200 Increase 10/300 GL column (GE  
471 Healthcare Life Sciences) equilibrated in assay buffer and run at room temperature. The 1:0.25  
472 mixture was used directly for mass-spectrometry. For each condition, 4  $\mu$ L per reaction of 20  $\mu$ M  
473 concentration of purified complex or 20  $\mu$ M octamer-mix was diluted to 10  $\mu$ M in 50 mM HEPES pH  
474 7.5 and cross-linked for 15 minutes at room temperature with 500  $\mu$ M disuccinimidyl sulfoxide (DSSO).  
475 The reaction was quenched with 1 M Tris pH 7.5 (50 mM final concentration). The cross-linking  
476 reaction was performed three times per sample. Each sample was supplemented with urea to 8 M,  
477 reduced by addition of DTT at a final concentration of 10 mM for 1 hour at room temperature, and  
478 alkylated for 0.5 hours at room temperature in the dark by addition of iodoacetamide at a final  
479 concentration of 50 mM, and quenched with DTT to 50 mM. The samples were digested in two rounds.  
480 In the first round, the samples were digested with Lys-C at an enzyme-to-protein ratio of 1:50 (w/w)  
481 at 30  $^{\circ}$ C for 3 hours, then diluted four times in 50 mM AmBic and further digested with trypsin at an  
482 enzyme-to-protein ratio of 1:100 (w/w) at 37  $^{\circ}$ C for 16 hours. The digested samples were desalted  
483 using homemade C18 stage tips, dried and stored at -80  $^{\circ}$ C until further use.

484 The samples were analyzed by LC-MS/MS using an Agilent 1290 Infinity System (Agilent Technologies)  
485 in combination with an Orbitrap Fusion Lumos (Thermo Scientific). Reverse phase chromatography  
486 was carried out using a 100- $\mu$ m inner diameter 2-cm trap column (packed in-house with ReproSil-Pur  
487 C18-AQ, 3  $\mu$ m) coupled to a 75- $\mu$ m inner diameter 50 cm analytical column (packed in-house with  
488 Poroshell 120 EC-C18, 2.7  $\mu$ m) (Agilent Technologies). Mobile-phase solvent A consisted of 0.1%  
489 formic acid in water, and mobile-phase solvent B consisted of 0.1% formic acid in 80% acetonitrile. A  
490 120-minute gradient was used and start and end percentage of buffer B were adjusted to maximize  
491 sample separation. MS acquisition was performed using the MS2\_MS3 strategy, where the MS1 scan

492 was recorded in Orbitrap at a resolution of 60000, the selected precursors were fragmented in MS2  
493 with CID and the cross-linker signature peaks recorded at a resolution of 30000, and the fragments  
494 displaying the mass difference specific for DSSO were further fragmented in a MS3 scan in the ion trap  
495 (IT)(36). All the samples were analyzed with Proteome Discoverer (version 2.2.0.388) with the XlinkX  
496 nodes integrated as described previously(36, 37).

497 For analysis, only cross-links reproduced in two out of three replicate experiments were considered.  
498 For analysis of intermolecular histone-histone cross-links, cross-links to the flexible tails of the  
499 histones were excluded as any cross-link with CMS < 1. The set of filtered inter-histone cross-links  
500 within the histone core were analyzed for compatibility with nucleosome structure (PDB 2PYO) by  
501 calculating the solvent accessible surface distance (SASD) between the C $\alpha$  atoms of cross-linked  
502 lysines using Jwalk(38). Considering the maximum distance between the C $\alpha$  atoms between DSSO  
503 cross-linked lysines is 23 Å, cross-links were categorized as incompatible with the native histone  
504 octamer structure when the SASD was more than 27 Å, using a 4 Å tolerance to account for backbone  
505 dynamics. Cross-links with SASD between 23 and 27 Å are only compatible when allowing for  
506 backbone dynamics while cross-links with SASD up to 23 Å are fully compatible with the native  
507 structure.

508

### 509 **NMR spectroscopy**

510 All NMR experiments were carried out on Bruker Avance III HD spectrometers. NMR spectra were  
511 processed using Bruker TopSpin and analyzed using Sparky(39). NMR titrations of APLF<sup>AD</sup> with H2A-  
512 H2B, H3-H4, or octamer-mix were done at 900 MHz <sup>1</sup>H Larmor frequency at 298 K in NMR buffer (25  
513 mM NaPi, pH 7, 5% D<sub>2</sub>O, with 1x protease inhibitors (complete EDTA-free cocktail, Roche)) with 600  
514 mM NaCl for the titrations with H2A-H2B and H3-H4 and 300 mM NaCl for titration with octamer-mix.  
515 The titration was monitored using [<sup>1</sup>H-<sup>15</sup>N]-TROSY spectra, in 14 points from 1:0 to 1:2 molar ratio  
516 APLF<sup>AD</sup>:H2A-H2B and APLF<sup>AD</sup>:H3-H4 and in 4 points from 1:0 to 1:0.045 APLF<sup>AD</sup> to histone octamer  
517 equivalent. For titrations with H2A-H2B and H3-H4, 20 μM of [U-<sup>15</sup>N]-APLF<sup>AD</sup> was used, while for the  
518 titration with octamer-mix 300 μM [U-<sup>2</sup>H/<sup>13</sup>C/<sup>15</sup>N]-APLF<sup>AD</sup> was used. Reported peak intensity ratios  
519 were corrected for differences in protein concentration (due to dilution) and number of scans.  
520 Residue-specific chemical shift perturbations (CSPs) were quantified from the perturbations in the <sup>1</sup>H  
521 ( $\Delta\delta_H$ ) and <sup>15</sup>N ( $\Delta\delta_N$ ) dimensions as the weighted average (composite) CSP in ppm:

$$522 \text{ CSP} = \sqrt{\Delta\delta_H^2 + (\Delta\delta_N/6.51)^2}.$$

523 Assignment of H3 in H3-H4 was carried out using 325 μM [U-<sup>2</sup>H/<sup>13</sup>C/<sup>15</sup>N]-H3-H4 in 290 mM acetate  
524 buffer, pH 3.8, 1 mM EDTA, 5 mM BME, 5% D<sub>2</sub>O, 0.02% NaN<sub>3</sub> with 1x protease inhibitors (complete  
525 EDTA-free cocktail, Roche). Backbone assignments were based on TROSY-based HNCA, HN(CO)CA,

526 HNCB, and HN(CO)CB spectra, recorded at 900 MHz at 298 K. Backbone assignment was ~80%  
527 complete and will be reported elsewhere. To map the binding site of APLF<sup>AD</sup> on the H3-H4 surface, 20  
528  $\mu\text{M}$  [ $U\text{-}^2\text{H}/^{13}\text{C}/^{15}\text{N}$ ]H3-H4 was incubated in assay buffer (25 mM NaPi, pH 7.0, 300 mM NaCl)  
529 supplemented with 1 mM EDTA and 5 mM BME with 0, 10, or 20  $\mu\text{M}$  peptide corresponding to APLF<sup>459-</sup>  
530 <sup>474</sup> (sequence: Ac-PNEYDLNDSFLDDEEE-NH<sub>2</sub>, Biomatik, dissolved in assay buffer supplemented with 1  
531 mM EDTA and 5 mM BME) for 30 minutes on ice. The mixture was subsequently buffer exchanged to  
532 50 mM acetate buffer, pH 5, 1 mM EDTA, 5 mM BME, 5% D<sub>2</sub>O, 0.02% NaN<sub>3</sub>, with 1x protease inhibitors  
533 (complete EDTA-free cocktail, Roche) using a 10 kDa molecular weight cut-off (MWCO) Amicon Ultra  
534 Centrifugal Filter Unit (Merck Millipore). The titration was followed by [ $^1\text{H},^{15}\text{N}$ ]-TROSY spectra  
535 recorded at a 900 MHz spectrometer at 308 K.

536 To probe the interaction surface of APLF<sup>AD</sup> for the octamer-mix,  $^{15}\text{N}$  TROSY CPMG relaxation dispersion  
537 experiments were performed at 298 K using [ $U\text{-}^2\text{H}\text{-}^{13}\text{C}\text{-}^{15}\text{N}$ ]APLF<sup>AD</sup> alone or after the addition of 1.5%  
538 octamer-mix in NMR buffer with 300 mM NaCl. Data on the free protein were recorded at 900 MHz  
539 using a relaxation delay value of 40 ms (19 CPMG pulsing rates ranging between 25 and 1000 Hz  
540 including three replicates). CPMG dispersion profiles in presence of octamer-mix were recorded at  
541 600 and 900 MHz using relaxation delay of, respectively, 40 and 20 ms (using 17 CPMG pulsing rates  
542 ranging between 25 and 1000 Hz for the 600 MHz data and 16 points between 50 and 1000 Hz, each  
543 time including three replicates). Peak intensities were extracted by fitting the line-shapes and  
544 converted to effective transverse relaxation rates,  $R_{2,eff}$ , using PINT(40, 41). Dispersion profiles for  
545 resonances with significant dispersion of  $R_{2,eff}$  values ( $R_{2,eff} > 2 \text{ s}^{-1}$  at 600 MHz) were subsequently fitted  
546 simultaneously in CATIA (<https://www.ucl.ac.uk/hansen-lab/catia/>) to extract chemical shift  
547 differences between free and bound states together with the population of the bound state and the  
548 exchange rate as global parameters using a two-site exchange model. Minimum error on  $R_{2,eff}$  during  
549 fitting was set to 2% or  $0.3 \text{ s}^{-1}$ . Four residues (S467, L469, V497 and K511) were excluded from the  
550 final fit as their profiles indicated a more complex exchange behavior, resulting in a final data set of  
551 28 dispersion profiles. The error surface of the fit was mapped using a grid-search, shown in Fig. S14.

552

### 553 **Small-angle X-ray scattering (SAXS)**

554 Samples for SAXS were prepared in SAXS buffer (25 mM NaPi, pH 7, 300 mM NaCl, 3% v/v glycerol, 1  
555 mM DTT). Octamer-mix was mixed with APLF<sup>AD</sup> in assay buffer at a ratio corresponding to 1:2.5 histone  
556 octamer equivalents to APLF<sup>AD</sup>, concentrated using a 30 kDa MWCO Amicon Ultra Centrifugal Filter Unit  
557 (Merck Millipore), and purified on a HiLoad 16/600 Superdex 200 pg column (GE Healthcare Life  
558 Sciences) equilibrated in SAXS buffer and run at 4 °C. Elution fractions containing the complex were  
559 pooled, concentrated as above, flash-frozen in liquid nitrogen and stored at -20 °C until further use.

560 Synchrotron radiation X-ray scattering data from the complexes in size exclusion chromatography  
561 coupled SAXS (SEC-SAXS) and standard batch mode were collected at the EMBL P12 beamline of the  
562 storage ring PETRA III (DESY, Hamburg, Germany)(42). Images were collected using a photon counting  
563 Pilatus-6M detector at a sample to detector distance of 3.1 m and a wavelength ( $\lambda$ ) of 0.12 nm covering  
564 the range of momentum transfer ( $s$ )  $0.15 < s < 5 \text{ nm}^{-1}$ ; with  $s=4\pi\sin\vartheta/\lambda$ , where  $2\vartheta$  is the scattering  
565 angle. In batch mode, a continuous flow cell capillary was used to reduce radiation damage. The latter  
566 was monitored by collecting 20 successive 50 ms exposures, comparing the frames, and discarding  
567 those displaying significant alterations. SEC-SAXS data was collected and analyzed as described  
568 previously(43). For this, a Superdex 200 incr. 10/300 column (GE Healthcare) was well equilibrated  
569 with SAXS buffer at a flow rate of 0.6 ml/min. SAXS data (3000 frames with 1 sec exposure) was  
570 collected on the sample after passing through the column. Data analysis was performed with  
571 Chromixs(44).

572 The final (background subtracted) SAXS profiles were subjected to standard SAXS analysis as follows.  
573 The data were normalized to the intensity of the transmitted beam and radially averaged; the  
574 scattering of pure buffer was used for background subtraction and the difference curves were scaled  
575 for solute concentration. The forward scattering  $I(0)$ , the radius of gyration ( $R_g$ ) along with the  
576 probability distribution of the particle distances  $P(r)$  and the maximal dimension ( $D_{\max}$ ) were computed  
577 using the automated SAXS data analysis pipeline SASFLOW(45) and various tools as implemented in  
578 ATSAS 2.8 package(46). The molecular masses (MM) were evaluated by comparison of the forward  
579 scattering with that from reference solutions of bovine serum albumin. In addition, several  
580 concentration-independent methods were applied utilizing empirical relationships between MM and  
581 several structural parameters obtained directly from the data(47). The *ab initio* bead modelling was  
582 performed using 10 independent runs of DAMMIF(48), from these the most probable model was  
583 selected for further analysis by DAMAVER(49). CRY SOL(50) was used to calculate the scattering profile  
584 from the atomic model described here and to compare with the experimental data.

585

### 586 **Chaperone assay**

587 The chaperone assay was conducted in assay buffer (25 mM NaPi, pH 7.0, 300 mM NaCl) at room  
588 temperature. The ratio of octamer-mix to DNA (167 bp 601 sequence) that caused almost complete  
589 precipitation was determined experimentally at a ratio of 2–3 molar equivalents of histone octamer-  
590 mix to DNA. For the assay, octamer-mix (final reaction concentration: 2  $\mu\text{M}$ ) was pre-incubated alone  
591 or with APLF<sup>AD</sup> wildtype (WT) (final reaction concentrations: 50, 100, 200  $\mu\text{M}$ ). All APLF<sup>AD</sup> were with a  
592 N-terminally fused SUMO-tag. Binding of chaperone to histone was allowed to proceed at room  
593 temperature (RT) for 15 min before the addition of DNA to a final concentration of 1  $\mu\text{M}$  in a total

594 reaction volume of 20  $\mu$ L. The reaction mixture was incubated at RT for 1 h followed by addition of 5  
595  $\mu$ L native PAGE loading buffer (10 mM Tris-HCl, pH 7.5, 1 mM EDTA, 1 mM DTT, 0.1 mM PMSF, 0.1  
596 mg/ml BSA, 25% sucrose, 0.1% bromophenol blue) and removal of precipitates by centrifugation at  
597 12,000  $g$  for 5 minutes at 4  $^{\circ}$ C. Soluble complexes were separated on a pre-equilibrated 5%  
598 polyacrylamide gel, run in 0.2  $\times$  TBE (17.8 mM Tris, 17.8 mM boric acid, 0.4 mM EDTA) buffer at 150 V  
599 for 1 hour, at 4  $^{\circ}$ C. The gel was stained with DNA stain G (SERVA) before visualization using a Molecular  
600 Imager Gel Doc XR System (Bio-Rad).

601

#### 602 **Nucleosome assembly assay and micrococcal nuclease digestion**

603 Nucleosome assembly reactions were carried out as in the chaperone assay described above, with the  
604 following modifications: the reactions were run in 25 mM Tris pH 7, 300 mM NaCl (reaction buffer)  
605 using a 165 bp DNA fragment, all concentrated protein stocks were diluted in reaction buffer before  
606 use, concentration of octamer-mix was used at 3  $\mu$ M, and the incubation was performed using  
607 untagged wild-type APLF<sup>AD</sup> in a total reaction volume of 12  $\mu$ L. After incubation of the octamer-mix  
608 with or without APLF<sup>AD</sup> and DNA in reaction buffer, 4  $\mu$ L of reaction mixture was transferred to fresh  
609 tubes and 1.25  $\mu$ L 50% glycerol added to include as samples for native PAGE analysis before  
610 micrococcal nuclease (MNase) digestion. Another 5  $\mu$ L from the reaction was transferred to fresh  
611 tubes to perform MNase digestion. The sample was diluted to a final volume of 25  $\mu$ L and final buffer  
612 composition of 25 mM Tris pH 7, 150 mM NaCl. Each sample was mixed with 10  $\mu$ L 10x MNase buffer  
613 (New England Biolabs), 1  $\mu$ L 100x BSA (New England Biolabs), 1  $\mu$ L of MNase (stock at 25 U/ $\mu$ L) (New  
614 England Biolabs) and 63  $\mu$ L of water. After incubation at 37  $^{\circ}$ C for 10 minutes, the reactions were  
615 quenched by adding 10  $\mu$ L 500 mM EDTA (final EDTA concentration  $\sim$ 50 mM). The samples were  
616 treated with 25  $\mu$ g Proteinase K (1.25  $\mu$ L of 20 mg/mL stock solution, New England Biolabs) and  
617 incubated at 50  $^{\circ}$ C for 20 minutes. The MinElute PCR Purification Kit (Qiagen) was used to purify  
618 digested DNA fragments, after addition of a 621 bp loading control DNA fragment. The final elution  
619 was performed with 10  $\mu$ L TE buffer (10 mM Tris pH 8, 1 mM EDTA). These samples, together with  
620 control samples taken before MNase digestion, were run on a 6% polyacrylamide gel (Invitrogen) in  
621 0.2  $\times$  TBE buffer at 150 V for 50 minutes, at RT. The gel was stained with SYBR<sup>TM</sup> Gold Nucleic Acid Gel  
622 Stain (Invitrogen) before visualization using a Molecular Imager Gel Doc XR System (Bio-Rad).  
623 Quantification of protected DNA fragments was performed using Bioanalyzer High sensitivity DNA  
624 chips, as previously described(29). The significance of the increase of bands in the nucleosomal size  
625 range was tested using one-tailed Students'  $t$ -test in MATLAB 2016 (The MathWorks, Inc.).

626

627

## 628 **APLF-octamer-DNA ternary complex formation and detection**

629 To test if the APLF<sup>AD</sup>-histone octamer complex can bind DNA, we used a native PAGE electrophoretic  
630 mobility shift assay using tetramethylrhodamine (TAMRA) fluorescent dye-tagged APLF, *Xenopus*  
631 *laevis* refolded histone octamer containing AlexaFluor647-labeled H2B T112C(51), and a 49 bp double-  
632 stranded DNA with the sequence GCACCGCTTAAACGCACGTACGCGCTGTCCCCGCGTTTTAACCGCCAA  
633 (Eurofins) corresponding to the center of the 601 sequence(34, 35). Histones were obtained from  
634 histone source at Colorado State University (<https://histonesource-colostate.nbsstore.net>) and  
635 refolded as above. Labeled APLF<sup>AD</sup> proteins were obtained by addition of TAMRA (16 mM) to APLF<sup>AD</sup>  
636 (buffer exchanged to 50 mM NaPi, pH 8.3) at 2-4x molar excess of dye, followed by incubation over 2  
637 days at 4 °C and purification using PD-10 Desalting Columns (Cytiva). Proteins were concentrated using  
638 3 kDa MWCO Amicon Ultra-0.5 Centrifugal Filter Units (Merck Millipore). Protein concentrations were  
639 determined using the Proteins and Labels function on a Thermo Scientific™ NanoDrop™ One  
640 Microvolume UV-Vis Spectrophotometer and subsequently confirmed on SDS-PAGE gel upon  
641 Coomassie staining and colorimetric imaging on an Amersham ImageQuant 800 CCD Imager.

642 The APLF<sup>AD</sup>-histone octamer complex was assembled using the salt-dilution method from  
643 fluorescently tagged proteins. APLF<sup>AD</sup> and histone octamer were mixed at 2:1 molar ratio in 25 mM  
644 NaPi, pH 7, 2 M NaCl and diluted stepwise by adding 25 mM NaPi, pH 7, no salt buffer to a final salt  
645 concentration of 0.6 M NaCl, targeting a final complex concentration of 20 μM. After removal of  
646 precipitates by spin-down at 12,000 g for 5 min and 4 °C, DNA was added at a 1:1 molar ratio to the  
647 histone octamer-chaperone complex (2 μM final concentration) and incubated for 1 hour at room  
648 temperature in 25 mM NaPi, pH 7, 300 mM NaCl. The ternary complex was obtained after  
649 centrifugation at 12,000 g for 5 min and 4 °C to remove precipitates. The ternary complex was  
650 crosslinked using disuccinimidyl suberate (DSS) (Thermo Fisher Scientific) at 1 mM for 20 min at room  
651 temperature. Control reactions used DMSO instead of the crosslinker. Samples were centrifuged at  
652 12,000 g for 5 min and 4 °C before loading with 20% glycerol on a 6% DNA retardation polyacrylamide  
653 gel, run in 0.2x TBE at 120 V for 1 hour at 4 °C. Gels were imaged on an Amersham ImageQuant 800  
654 CCD Imager, using a Cy3 scan for APLF signal and a Cy5 scan for the histone octamer. After SYBR Gold  
655 staining, the Cy3 scan detected predominantly the DNA signal with a small contribution of the APLF  
656 signal and the Cy5 scan detected histone octamer signal. Scans were merged using ImageJ  
657 software(52).

658

## 659 **Crystallization and data collection**

660 For crystallization attempts, various APLF and histone constructs were tested. Initial conditions with  
661 full-length proteins led to clear drops and phase separation. Crystals used for structure determination



662 were obtained with APLF<sup>AD-Δ</sup> (*Homo sapiens* (*Hs.*) APLF residues 449-490, with N-terminal Gly as  
663 leftover from TEV-cleavage site) and tailless *Xenopus laevis* (*Xl.*) histones H2A (residues 13-118), H2B  
664 (residues 27-125), H3 (residues 38-135), and H4 (residues 20-102). To reconstitute the complex,  
665 APLF<sup>AD-Δ</sup> was buffer exchanged to 10 mM Tris-HCl, pH 7.5, 1 mM EDTA, 5 mM BME, 2 M NaCl using a  
666 3 kDa MWCO Amicon Ultra Centrifugal Filter Unit (Merck Millipore) and mixed with tailless *Xl* histone  
667 octamer in the same buffer at a molar ratio 2:1 APLF<sup>AD-Δ</sup>:histone octamer on ice. After stepwise  
668 dilution to 600 mM NaCl, the complex was concentrated using a 30 kDa MWCO Amicon Ultra  
669 Centrifugal Filter Unit (Merck Millipore) and purified by gel filtration on a HiLoad 16/600 Superdex 200  
670 pg column (GE Healthcare Life Sciences) pre-equilibrated with 20 mM HEPES, pH 7.5, 1 mM DTT, 600  
671 mM NaCl. Elution fractions containing the complex were pooled and concentrated as above and used  
672 directly for crystal screening using the vapor diffusion sitting drop method. Crystals used for the  
673 structure determination were obtained from the commercial screen JCSG+ Suite (Qiagen) by mixing  
674 complex and reservoir solution in an MRC2 plate (SWISSCI) at two different ratios (1.25:0.75 and  
675 0.75:1.25 complex:reservoir). Crystals grew in up to 4 months and at 20 °C in a solution of 0.1 M  
676 sodium cacodylate pH 6.5, 1 M tri-sodium citrate. Crystals were transferred to the reservoir solution  
677 supplemented with 20% glycerol and quickly frozen in liquid nitrogen. Crystallographic data were  
678 collected on beamline X6A at the Swiss Light Source and the structure was refined to 2.35 Å resolution  
679 (Extended Data Table 1).

680

### 681 **Crystal structure determination, model building and refinement**

682 All data were processed and scaled with XDS package and Aimless(53, 54). Structure determination  
683 was performed by molecular replacement with Phaser(55), using the H2A-H2B-H3-H4 octamer  
684 structure (PDB: 2HIO) as searching model. Model building and refinement were performed with  
685 COOT(56), phenix refine(57) and PDB-REDO(58). The data collection and refinement statistics are  
686 summarized in Extended Data Table 1. There are four NCS complexes in the asymmetric unit.  
687 Depending slightly on the copy, the final model includes residues 16/17 to 118/119 for H2A, 36/37 to  
688 124/125 for H2B, 41 to 135 for H3, 25/27 to 100/101 for H4, and 458/459 to 487 for APLF<sup>AD</sup>, with clear  
689 density for APLF<sup>AD</sup> residues 472/474 to 479/481 missing in all but one APLF<sup>AD</sup> chain (see Fig. S7). The  
690 continuous density for one APLF<sup>AD</sup> chain is likely the result of a crystal packing interaction as shown in  
691 Fig. S10. Figures were made using PYMOL (the PyMOL Molecular Graphics System, version 2.3,  
692 Schrödinger, LLC). Plots of electrostatic surface potential were generated using the APBS-tool(59) in  
693 PyMOL.

694

### 695 **Structural modelling of the full-length APLF<sup>AD</sup> complex**

696 The model of the full-length APLF<sup>AD</sup> bound to histone octamer was derived from the APLF<sup>AD-Δ</sup>-histone  
697 octamer crystal structure by first building the missing APLF<sup>AD</sup> residues using MODELLER(60), and then  
698 refining the resulting models in HADDOCK(61). Briefly, first the missing residues in the linker region  
699 (475-481) of one APLF<sup>AD</sup> chain were added, selecting the best ranking model for further modelling.  
700 Second, the missing N-terminal residues (450-458) were built, selecting the model with least contact  
701 between the N-terminal segment and the histone surface, in line with the NMR results that show that  
702 the N-terminal residues remain highly flexible in the complex. Third, the two missing C-terminal H2B  
703 residues were built, selecting the best ranking model. Fourth, the missing C-terminal APLF<sup>AD</sup> residues  
704 were built taking into account the intermolecular cross-links between APLF<sup>AD</sup> and the histones  
705 observed at 1:1:0.125 H2A-H2B:H3-H4:APLF<sup>AD</sup>. For each APLF<sup>AD</sup> chain, two distance restraints were  
706 added with 25 Å upper limit and 1 Å tolerance to restrain the C $\alpha$ -C $\alpha$  distance of the cross-linked  
707 residues (APLF<sup>AD</sup> K505 to H2B K122 and APLF<sup>AD</sup> K509 to H2B K113). Since the experimental data do not  
708 discriminate which copy of APLF<sup>AD</sup> is cross-linked to which copy of H2B, two modelling runs were  
709 performed. In the first, the cross-links were set between the APLF<sup>AD</sup> and the H2B copy that is already  
710 bound by the same APLF<sup>AD</sup> copy (the proximal H2B). In the second run, the cross-links were set  
711 between the APLF<sup>AD</sup> and the H2B copy that is bound by the other APLF<sup>AD</sup> copy (the distal H2B). In each  
712 run 20 models were built. From each model, the APLF<sup>AD</sup> coordinates were extracted, resulting in total  
713 in 40 conformations for each APLF<sup>AD</sup> chain. Next, these models were refined in HADDOCK to select the  
714 final ensemble of 20 best solutions. Docking was set up as a three-body docking with the histone  
715 octamer structure and one ensemble of 20 conformations (either of the H2B distal or H2B proximal  
716 variety) for each APLF<sup>AD</sup> chain. The starting structures were fixed to original position in the rigid body  
717 docking phase. Of the 400 models generated, 200 were refined in the semi-flexible refinement stage  
718 and subsequently refined in explicit water. From the 50 best ranking structures from the H2B distal  
719 and the H2B proximal run, those structures in which the solvent accessible surface distance (SASD)  
720 between the C $\alpha$  atoms of cross-linked lysines, calculated using Jwalk(38), was less than 27 Å were  
721 extracted, combined and sorted using their HADDOCK score. The 20 best scoring models were selected  
722 as the final ensemble. This ensemble contained 7 APLF<sup>AD</sup> in the H2B proximal conformation and 13 in  
723 the H2B distal conformation.

724

#### 725 **Cell line, transfections, and plasmids**

726 U2OS cells were cultured in 5% CO<sub>2</sub> at 37 °C in DMEM (Dulbecco's modified Eagle's medium)  
727 supplemented with 10% fetal calf serum and antibiotics. U2OS cells were transfected with plasmid  
728 DNA using Lipofectamine 2000 (Invitrogen) according to the manufacturer's instructions and analysed  
729 24 hours after transfection. The expression vector for full-length human APLF was amplified from

730 plasmid APLF-PC1-PURO'(62) and cloned into pCDNA5/FRT/TO-Puro as a XhoI/HindIII fragment using  
731 primers listed in Supplementary Table S4. APLF mutants DA-34 (Y462A/F468A), DA-AB  
732 (Y476A/W485A), QA (Y462A/F468A/Y476A/W485A) and  $\Delta$ AD were generated by site-directed  
733 mutagenesis PCR using primers listed in Supplementary Table S4. All APLF expression constructs were  
734 verified using Sanger sequencing. The plasmid for mCherry-NBS1 expression was previously  
735 described(63). Generation of U2OS Flp-In/T-Rex cells for eGFP-APLF expression was previously  
736 described(64). Briefly, pCDNA5/FRT/TO-Puro plasmid encoding eGFP-APLF wildtype and mutants (5  
737  $\mu$ g), were co-transfected together with pOG44 plasmid encoding the Flp recombinase (1  $\mu$ g). After  
738 selection on 1  $\mu$ g/mL puromycin, single clones were isolated and expanded. U2OS Flp-In/T-Rex clones  
739 were incubated with 2  $\mu$ g/mL doxycycline for 24 h to induce expression of cDNAs.

740

#### 741 **GFP Pull-down assays**

742 GFP pull-downs were performed on U2OS Flp-In/T-Rex cells expressing eGFP-APLF-WT or the  
743 indicated eGFP-tagged APLF mutants as previously described(64). Cells were lysed in EBC buffer (50  
744 mM Tris, pH 7.5, 150 mM NaCl, 0.5% NP-40, 1 mM MgCl<sub>2</sub>, protease inhibitor cocktail tablets) with 500  
745 units benzonase. Samples were incubated for 1 h at 4 °C under constant mixing. 50  $\mu$ L input sample  
746 was collected in a separate tube and mixed with 2 $\times$  Laemmli buffer. The cleared lysates were subjected  
747 to GFP pull-down with GFP-Trap beads (Chromotek). The beads were then washed six times with EBC  
748 buffer and boiled in 2 $\times$  Laemmli buffer along with the input samples. Samples were subjected to  
749 western blot analysis using primary antibodies listed in Table S5.

750

#### 751 **365 nm UV-A Laser micro-irradiation and APLF recruitment**

752 U2OS cells were grown on 18-mm coverslips and sensitized with 15  $\mu$ M 5'-bromo-2-deoxyuridine  
753 (BrdU) for 24 h before micro-irradiation. For micro-irradiation, cells were placed in a live-cell imaging  
754 chamber set to 37 °C in CO<sub>2</sub>-independent Leibovitz's L15 medium supplemented with 10% FCS. Live  
755 cell imaging and micro-irradiation experiments were carried out with a Zeiss Axio Observer  
756 microscope driven by ZEN software using a  $\times$ 63/1.4 oil immersion objective coupled to a 355 nm  
757 pulsed DPSS UV-laser (Rapp OptoElectronic). Images were recorded using ZEN 2012 software and  
758 analyzed in Image J(52). The integrated density of laser tracks was measured within the locally  
759 irradiated area ( $I_{\text{damage}}$ ) and divided over that area. The same was done for the nucleoplasm outside  
760 the locally irradiated area ( $I_{\text{nucleoplasm}}$ ) and in a region not containing cells in the same field of view  
761 ( $I_{\text{background}}$ ). The level of protein accumulation in the laser track relative to the protein level in the  
762 nucleoplasm was calculated as follows:  $((I_{\text{damage}} - I_{\text{background}})/(I_{\text{nucleoplasm}} - I_{\text{background}}) - 1)$ .



## 764 References

- 765 1. R. A. Laskey, B. M. Honda, A. D. Mills, J. T. Finch, Nucleosomes are assembled by an acidic  
766 protein which binds histones and transfers them to DNA. *Nature*. **275**, 416–420 (1978).
- 767 2. C. M. Hammond, C. B. Strømme, H. Huang, D. J. Patel, A. Groth, Histone chaperone networks  
768 shaping chromatin function. *Nat. Rev. Mol. Cell Biol.* **18**, 141–158 (2017).
- 769 3. Z. A. Gurard-Levin, J.-P. Quivy, G. Almouzni, Histone Chaperones: Assisting Histone Traffic and  
770 Nucleosome Dynamics. *Annu. Rev. Biochem.* **83**, 487–517 (2014).
- 771 4. J. A. Kleinschmidt, A. Seiter, H. Zentgraf, Nucleosome assembly in vitro: Separate histone  
772 transfer and synergistic interaction of native histone complexes purified from nuclei of  
773 *Xenopus laevis* oocytes. *EMBO J.* **9**, 1309–1318 (1990).
- 774 5. S. J. Elsässer, S. D’Arcy, Towards a mechanism for histone chaperones. *Biochim. Biophys. Acta*  
775 *- Gene Regul. Mech.* **1819**, 211–221 (2012).
- 776 6. N. Iles, S. Rulten, S. F. El-Khamisy, K. W. Caldecott, APLF (C2orf13) Is a Novel Human Protein  
777 Involved in the Cellular Response to Chromosomal DNA Strand Breaks. *Mol. Cell. Biol.* **27**,  
778 3793–3803 (2007).
- 779 7. C. J. Macrae, R. D. McCulloch, J. Ylanko, D. Durocher, C. A. Koch, APLF (C2orf13) facilitates  
780 nonhomologous end-joining and undergoes ATM-dependent hyperphosphorylation following  
781 ionizing radiation. *DNA Repair (Amst)*. **7**, 292–302 (2008).
- 782 8. G. J. Grundy, S. L. Rulten, Z. Zeng, R. Arribas-Bosacoma, N. Iles, K. Manley, A. Oliver, K. W.  
783 Caldecott, APLF promotes the assembly and activity of non-homologous end joining protein  
784 complexes. *EMBO J.* **32**, 112–125 (2013).
- 785 9. L. Woodbine, A. R. Gennery, P. A. Jeggo, The clinical impact of deficiency in DNA non-  
786 homologous end-joining. *DNA Repair (Amst)*. **16**, 84–96 (2014).
- 787 10. B. J. Sishc, A. J. Davis, The role of the core non-homologous end joining factors in  
788 carcinogenesis and cancer. *Cancers (Basel)*. **9** (2017).
- 789 11. M. Hammel, Y. Yu, S. K. Radhakrishnan, C. Chokshi, M. S. Tsai, Y. Matsumoto, M. Kuzdovich, S.  
790 G. Remesh, S. Fang, A. E. Tomkinson, S. P. Lees-Miller, J. A. Tainer, An intrinsically disordered  
791 APLF links Ku, DNA-PKcs, and XRCC4-DNA ligase IV in an extended flexible non-homologous  
792 end joining complex. *J. Biol. Chem.* **291**, 26987–27006 (2016).
- 793 12. P. Shirodkar, A. L. Fenton, L. Meng, C. A. Koch, Identification and functional characterization

- 794 of a Ku-binding motif in aprataxin polynucleotide kinase/phosphatase-like factor (APLF). *J.*  
795 *Biol. Chem.* **288**, 19604–19613 (2013).
- 796 13. P. V. Mehrotra, D. Ahel, D. P. Ryan, R. Weston, N. Wiechens, R. Kraehenbuehl, T. Owen-  
797 Hughes, I. Ahel, DNA Repair Factor APLF Is a Histone Chaperone. *Mol. Cell.* **41**, 46–55 (2011).
- 798 14. I. Corbeski, K. Dolinar, H. Wienk, R. Boelens, H. Van Ingen, DNA repair factor APLF acts as a  
799 H2A-H2B histone chaperone through binding its DNA interaction surface. *Nucleic Acids Res.*  
800 **46**, 7138–7152 (2018).
- 801 15. S. Dutta, I. V. Akey, C. Dingwall, K. L. Hartman, T. Laue, R. T. Nolte, J. F. Head, C. W. Akey, The  
802 crystal structure of nucleoplasmin-core: Implications for histone binding and nucleosome  
803 assembly. *Mol. Cell.* **8**, 841–853 (2001).
- 804 16. K. F. Tóth, J. Mazurkiewicz, K. Rippe, Association states of nucleosome assembly protein 1  
805 and its complexes with histones. *J. Biol. Chem.* **280**, 15690–15699 (2005).
- 806 17. S. Muto, M. Senda, Y. Akai, L. Sato, T. Suzuki, R. Nagai, T. Senda, M. Horikoshi, Relationship  
807 between the structure of SET/TAF- $\text{I}\beta$ /INHAT and its histone chaperone activity. *Proc. Natl.*  
808 *Acad. Sci. U. S. A.* **104**, 4285–4290 (2007).
- 809 18. Y. Tsunaka, Y. Fujiwara, T. Oyama, S. Hirose, K. Morikawa, Integrated molecular mechanism  
810 directing nucleosome reorganization by human FACT. *Genes Dev.* **30**, 673–686 (2016).
- 811 19. M. Zhang, H. Liu, Y. Gao, Z. Zhu, Z. Chen, P. Zheng, L. Xue, J. Li, M. Teng, L. Niu, Structural  
812 Insights into the Association of Hif1 with Histones H2A-H2B Dimer and H3-H4 Tetramer.  
813 *Structure.* **24**, 1810–1820 (2016).
- 814 20. Y. Lorch, M. Zhang, R. D. Kornberg, Histone octamer transfer by a Chromatin-Remodeling  
815 Complex. **96**, 389–392 (1999).
- 816 21. C. E. Rowe, G. J. Narlikar, The ATP-dependent remodeler RSC transfers histone dimers and  
817 octamers through the rapid formation of an unstable encounter intermediate. *Biochemistry.*  
818 **49**, 9882–9890 (2010).
- 819 22. J. Markert, K. Zhou, K. Luger, SMARCAD1 is an ATP-dependent histone octamer exchange  
820 factor with de novo nucleosome assembly activity. *Sci. Adv.* **7**, 1–12 (2021).
- 821 23. K. Luger, A. W. Mäder, R. K. Richmond, D. F. Sargent, T. J. Richmond, Crystal structure of the  
822 nucleosome core particle at 2.8 Å resolution. *Nature.* **389**, 251–260 (1997).
- 823 24. C. A. Davey, D. F. Sargent, K. Luger, A. W. Maeder, T. J. Richmond, Solvent Mediated

- 824 Interactions in the Structure of the Nucleosome Core Particle at 1.9 Å Resolution. *J. Mol. Biol.*  
825 **319**, 1097–1113 (2002).
- 826 25. D. J. Kemble, L. L. McCullough, F. G. Whitby, T. Formosa, C. P. Hill, FACT Disrupts Nucleosome  
827 Structure by Binding H2A-H2B with Conserved Peptide Motifs. *Mol. Cell.* **60**, 294–306 (2015).
- 828 26. Y. Wang, S. Liu, L. Sun, N. Xu, S. Shan, F. Wu, X. Liang, Y. Huang, E. Luk, C. Wu, Z. Zhou,  
829 Structural insights into histone chaperone Chz1-mediated H2A.Z recognition and histone  
830 replacement. *PLoS Biol.* **17**, 1–20 (2019).
- 831 27. M. D. Ricketts, J. Han, M. R. Szurgot, R. Marmorstein, Molecular basis for chromatin assembly  
832 and modification by multiprotein complexes. *Protein Sci.* **28**, 329–343 (2019).
- 833 28. M. Hondele, T. Stuwe, M. Hassler, F. Halbach, A. Bowman, E. T. Zhang, B. Nijmeijer, C.  
834 Kotthoff, V. Rybin, S. Amlacher, E. Hurt, A. G. Ladurner, Structural basis of histone H2A-H2B  
835 recognition by the essential chaperone FACT. *Nature.* **499**, 111–114 (2013).
- 836 29. F. Mattioli, Y. Gu, K. Luger, Measuring Nucleosome Assembly Activity in vitro with the  
837 Nucleosome Assembly and Quantification (NAQ) Assay. *Bio-Protocol.* **8**, 1–11 (2018).
- 838 30. S. Smith, B. Stillman, Stepwise assembly of chromatin during DNA replication in vitro. *EMBO J.*  
839 **10**, 971–980 (1991).
- 840 31. M. A. Hall, A. Shundrovsky, L. Bai, R. M. Fulbright, J. T. Lis, M. D. Wang, High-resolution  
841 dynamic mapping of histone-DNA interactions in a nucleosome. *Nat. Struct. Mol. Biol.* **16**,  
842 124–129 (2009).
- 843 32. C. Warren, D. Shechter, Fly Fishing for Histones : Catch and Release by Histone Chaperone  
844 Intrinsically Disordered Regions and Acidic Stretches. *J. Mol. Biol.* **429**, 2401–2426 (2017).
- 845 33. K. Luger, T. J. Rechsteiner, T. J. Richmond, Preparation of nucleosome core particle from  
846 recombinant histones. *Methods Enzymol.* **304**, 3–19 (1999).
- 847 34. P. T. Lowary, J. Widom, New DNA sequence rules for high affinity binding to histone octamer  
848 and sequence-directed nucleosome positioning. *J. Mol. Biol.* **276**, 19–42 (1998).
- 849 35. A. Thåström, L. M. Bingham, J. Widom, Nucleosomal Locations of Dominant DNA Sequence  
850 Motifs for Histone–DNA Interactions and Nucleosome Positioning. *J. Mol. Biol.* **338**, 695–709  
851 (2004).
- 852 36. F. Liu, P. Lössl, R. Scheltema, R. Viner, A. J. R. Heck, Optimized fragmentation schemes and  
853 data analysis strategies for proteome-wide cross-link identification. *Nat. Commun.* **8** (2017).

- 854 37. O. Klykov, B. Steigenberger, S. Pektaş, D. Fasci, A. J. R. Heck, R. A. Scheltema, Efficient and  
855 robust proteome-wide approaches for cross-linking mass spectrometry. *Nat. Protoc.* **13**,  
856 2964–2990 (2018).
- 857 38. J. M. A. Bullock, J. Schwab, K. Thalassinos, M. Topf, The importance of non-accessible  
858 crosslinks and solvent accessible surface distance in modeling proteins with restraints from  
859 crosslinking mass spectrometry. *Mol. Cell. Proteomics.* **15**, 2491–2500 (2016).
- 860 39. W. Lee, M. Tonelli, J. L. Markley, NMRFAM-SPARKY: Enhanced software for biomolecular  
861 NMR spectroscopy. *Bioinformatics.* **31**, 1325–1327 (2015).
- 862 40. M. Niklasson, R. Otten, A. Ahlner, C. Andresen, J. Schlagnitweit, K. Petzold, P. Lundström,  
863 Comprehensive analysis of NMR data using advanced line shape fitting. *J. Biomol. NMR.* **69**,  
864 93–99 (2017).
- 865 41. A. Ahlner, M. Carlsson, B. H. Jonsson, P. Lundström, PINT: A software for integration of peak  
866 volumes and extraction of relaxation rates. *J. Biomol. NMR.* **56**, 191–202 (2013).
- 867 42. C. E. Blanchet, A. Spilotros, F. Schwemmer, M. A. Graewert, A. Kikhney, C. M. Jeffries, D.  
868 Franke, D. Mark, R. Zengerle, F. Cipriani, S. Fiedler, M. Roessle, D. I. Svergun, Versatile sample  
869 environments and automation for biological solution X-ray scattering experiments at the P12  
870 beamline (PETRA III, DESY). *J. Appl. Crystallogr.* **48**, 431–443 (2015).
- 871 43. M. A. Graewert, S. Da Vela, T. W. Gräwert, D. S. Molodenskiy, C. E. Blanchet, D. I. Svergun, C.  
872 M. Jeffries, Adding Size Exclusion Chromatography (SEC) and Light Scattering (LS) Devices to  
873 Obtain High-Quality Small Angle X-Ray Scattering (SAXS) Data. *Cryst.* **10** (2020).
- 874 44. A. Panjkovich, D. I. Svergun, CHROMIXS: Automatic and interactive analysis of  
875 chromatography-coupled small-angle X-ray scattering data. *Bioinformatics.* **34**, 1944–1946  
876 (2018).
- 877 45. D. Franke, A. G. Kikhney, D. I. Svergun, Automated acquisition and analysis of small angle X-  
878 ray scattering data. *Nucl. Instruments Methods Phys. Res. Sect. A Accel. Spectrometers,*  
879 *Detect. Assoc. Equip.* **689**, 52–59 (2012).
- 880 46. D. Franke, M. V. Petoukhov, P. V. Konarev, A. Panjkovich, A. Tuukkanen, H. D. T. Mertens, A.  
881 G. Kikhney, N. R. Hajizadeh, J. M. Franklin, C. M. Jeffries, D. I. Svergun, ATSAS 2.8: A  
882 comprehensive data analysis suite for small-angle scattering from macromolecular solutions.  
883 *J. Appl. Crystallogr.* **50**, 1212–1225 (2017).
- 884 47. N. R. Hajizadeh, D. Franke, C. M. Jeffries, D. I. Svergun, Consensus Bayesian assessment of



- 885 protein molecular mass from solution X-ray scattering data. *Sci. Rep.* **8**, 1–13 (2018).
- 886 48. D. Franke, D. I. Svergun, DAMMIF, a program for rapid ab-initio shape determination in small-  
887 angle scattering. *J. Appl. Crystallogr.* **42**, 342–346 (2009).
- 888 49. V. V. Volkov, D. I. Svergun, Uniqueness of ab initio shape determination in small-angle  
889 scattering. *J. Appl. Crystallogr.* **36**, 860–864 (2003).
- 890 50. D. Svergun, C. Barberato, M. H. Koch, CRY SOL - A program to evaluate X-ray solution  
891 scattering of biological macromolecules from atomic coordinates. *J. Appl. Crystallogr.* **28**,  
892 768–773 (1995).
- 893 51. U. Muthurajan, F. Mattioli, S. Bergeron, K. Zhou, Y. Gu, S. Chakravarthy, P. Dyer, T. Irving, K.  
894 Luger, In Vitro Chromatin Assembly: Strategies and Quality Control. *Methods Enzymol.* **573**,  
895 3–41 (2016).
- 896 52. C. A. Schneider, W. S. Rasband, K. W. Eliceiri, NIH Image to ImageJ: 25 years of image analysis.  
897 *Nat. Methods.* **9**, 671–675 (2012).
- 898 53. W. Kabsch, Xds. *Acta Crystallogr. Sect. D Biol. Crystallogr.* **66**, 125–132 (2010).
- 899 54. P. R. Evans, G. N. Murshudov, How good are my data and what is the resolution? *Acta*  
900 *Crystallogr. Sect. D Biol. Crystallogr.* **69**, 1204–1214 (2013).
- 901 55. A. J. McCoy, R. W. Grosse-Kunstleve, P. D. Adams, M. D. Winn, L. C. Storoni, R. J. Read, Phaser  
902 crystallographic software. *J. Appl. Crystallogr.* **40**, 658–674 (2007).
- 903 56. P. Emsley, B. Lohkamp, W. G. Scott, K. Cowtan, Features and development of Coot. *Acta*  
904 *Crystallogr. Sect. D Biol. Crystallogr.* **66**, 486–501 (2010).
- 905 57. P. V. Afonine, R. W. Grosse-Kunstleve, N. Echols, J. J. Headd, N. W. Moriarty, M.  
906 Mustyakimov, T. C. Terwilliger, A. Urzhumtsev, P. H. Zwart, P. D. Adams, Towards automated  
907 crystallographic structure refinement with phenix. refine. *Acta Crystallogr. Sect. D Biol.*  
908 *Crystallogr.* **68**, 352–367 (2012).
- 909 58. R. P. Joosten, J. Salzemann, V. Bloch, H. Stockinger, A. C. Berglund, C. Blanchet, E. Bongcam-  
910 Rudloff, C. Combet, A. L. Da Costa, G. Deleage, M. Diarena, R. Fabbretti, G. Fettahi, V. Flegel,  
911 A. Gisel, V. Kasam, T. Kervinen, E. Korpelainen, K. Mattila, M. Pagni, M. Reichstadt, V. Breton,  
912 I. J. Tickle, G. Vriend, PDB-REDO: Automated re-refinement of X-ray structure models in the  
913 PDB. *J. Appl. Crystallogr.* **42**, 376–384 (2009).
- 914 59. N. A. Baker, D. Sept, S. Joseph, M. J. Holst, J. A. McCammon, Electrostatics of nanosystems:

- 915 Application to microtubules and the ribosome. *Proc. Natl. Acad. Sci. U. S. A.* **98**, 10037–10041  
916 (2001).
- 917 60. B. Webb, A. Sali, Comparative protein structure modeling using MODELLER. *Curr. Protoc.*  
918 *Protein Sci.* **86**, 2.9.1–2.9.37 (2016).
- 919 61. G. C. P. Van Zundert, J. P. G. L. M. Rodrigues, M. Trellet, C. Schmitz, P. L. Kastiris, E. Karaca, A.  
920 S. J. Melquiond, M. Van Dijk, S. J. De Vries, A. M. J. J. Bonvin, The HADDOCK2.2 Web Server:  
921 User-Friendly Integrative Modeling of Biomolecular Complexes. *J. Mol. Biol.* **428**, 720–725  
922 (2016).
- 923 62. S. L. Rulten, F. Cortes-Ledesma, L. Guo, N. J. Iles, K. W. Caldecott, APLF (C2orf13) is a novel  
924 component of poly(ADP-ribose) signaling in mammalian cells. *Mol. Cell. Biol.* **28**, 2620–2628  
925 (2008).
- 926 63. M. S. Luijsterburg, I. de Krijger, W. W. Wiegant, R. G. Shah, G. Smeenk, A. J. L. de Groot, A.  
927 Pines, A. C. O. Vertegaal, J. J. L. Jacobs, G. M. Shah, H. van Attikum, PARP1 Links CHD2-  
928 Mediated Chromatin Expansion and H3.3 Deposition to DNA Repair by Non-homologous End-  
929 Joining. *Mol. Cell.* **61**, 547–562 (2016).
- 930 64. J. K. Singh, R. Smith, M. B. Rother, A. J. L. de Groot, W. W. Wiegant, K. Vreeken, O.  
931 D’Augustin, R. Q. Kim, H. Qian, P. M. Krawczyk, R. González-Prieto, A. C. O. Vertegaal, M.  
932 Lamers, S. Huet, H. van Attikum, Zinc finger protein ZNF384 is an adaptor of Ku to DNA during  
933 classical non-homologous end-joining. *Nat. Commun.* **12**, 1–21 (2021).
- 934
- 935

936 **Acknowledgements**

937 We thank Raymond Schellevis for assistance in protein purification, Gert Folkers for lab support, and  
938 Johan van der Zwan and Andrei Gurinov for support and maintenance of the NMR infrastructure (all  
939 from the Utrecht NMR Group at Utrecht University). We thank Patrick Celie and Alexander Fish for  
940 help in setting up crystallization screens and Tatjana Heidebrecht for fishing crystals (all from  
941 Netherlands Cancer Institute). We thank the Swiss Light Source staff for X-ray diffraction synchrotron  
942 access and support. We thank the beamline P12 staff of EMBL Hamburg and the PETRA III storage ring  
943 staff of DESY (Hamburg, Germany) for SAXS synchrotron access. We thank Anneloes Blok and  
944 Marcellus Ubbink from Macromolecular Biochemistry, Leiden Institute of Chemistry, Leiden University  
945 for providing access to the VP-ITC MicroCalorimeter. We thank Pamela Dyer and Karolin Luger from  
946 the Department of Biochemistry, University of Colorado at Boulder for providing plasmids of tailless  
947 histones H3 and H4.

948

949 **Funding**

950 Marie Curie Initial Training Network Innovative Doctoral Programme ManiFold grant 317371 EC-  
951 FP7/2007-201 to the Utrecht University Bijvoet Centre.

952 Netherlands Organization for Scientific Research grant 723.013.010 (HvI)

953 European Research Council grant 851564 (FM)

954 Netherlands Organization for Scientific Research grant 175.107.301.10 (RB)

955 Netherlands Organization for Scientific Research grant 700.53.103 (RB)

956 Netherlands Organization for Scientific Research National Roadmap grant 184.032.207 to uNMR-NL,  
957 the National Roadmap Large-Scale NMR Facility of the Netherlands

958 European Research Council grant 731005 to INSTRUCT, for Instruct-ULTRA, an EU H2020 project to  
959 further develop the services of Instruct-ERIC

960 European Research Council project 823839 to Epic-X, an EU Horizon 2020 program INFRAIA project.

961 European Research Council grant 653706 to INEXT and grant 871037 to iNEXT-Discovery, an EU  
962 Horizon 2020 program, which provided financial support for SAXS measurements at beamline P12  
963 operated by EMBL Hamburg at the PETRA III storage ring (DESY, Hamburg, Germany)

964

965 **Author contributions**

966 Conceptualization: IC, FM, TKS, HVI

967 Investigation: IC, XG, BVE, FM, DF, MAG, WW, KV

968 Visualization: IC, FM, HVI

969 Funding acquisition: HVI, RB

970 Project administration: HVI, RB

971 Supervision: HVI, RB, HW, FM, TS, HVA, AH, TKS, DS

972 Writing – original draft: IC, HVI with input from all authors

973 Writing – review & editing: IC, FM, HVI with input from all authors

974

975 **Competing interests**

976 None of the authors declare a competing interest.

977

978 **Data availability**

979 All data needed to evaluate the conclusions in the paper are present in the paper and/or the  
980 Supplementary Materials. The coordinates of the APLF<sup>AD</sup>-histone octamer complex have been  
981 deposited in the Protein Data Bank under accession number 6YN1. The experimental SAXS data and  
982 models are deposited in SASBDB with the accession codes: SASDJJ5. The Native MS and cross-linking  
983 mass spectrometry data are available via Figshare: <https://figshare.com/s/43e763c4f078ce450cf8>  
984 (temporary reviewer link).

985

986 **Supplementary Materials**

987 Figs. S1 to S16

988 Tables S1 to S5

989
